1      **Asymmetrical diversification of the receptor-ligand interaction controlling self-**  
2                                      **incompatibility in Arabidopsis.**

3  
4      Chantreau Maxime<sup>1</sup>, Céline Poux<sup>1</sup>, Marc F. Lensink<sup>2</sup>, Guillaume Brysbaert<sup>2</sup>, Xavier Vekemans<sup>1</sup>  
5      & Vincent Castric<sup>1,3</sup>

6  
7      <sup>1</sup> CNRS, Univ. Lille, UMR 8198—Evo-Eco-Paléo, F-59000 Lille, France

8      <sup>2</sup> Univ. Lille, CNRS, UMR 8576 UGSF, F-59000, France

9      <sup>3</sup> Corresponding author: [Vincent.Castric@univ-lille.fr](mailto:Vincent.Castric@univ-lille.fr)

10

11      **Abstract (150 words)**

12      How two-components genetic systems accumulate evolutionary novelty and become  
13      diversified in the course of evolution is a fundamental problem in evolutionary systems  
14      biology. In the Brassicaceae, self-incompatibility (SI) is a spectacular example of a diversified  
15      allelic series in which numerous highly diverged receptor-ligand combinations are  
16      segregating in natural populations. However, the evolutionary mechanisms by which new SI  
17      specificities arise in the first place have remained elusive. Using *in planta* ancestral protein  
18      resurrection, we demonstrate that two allelic variants currently segregating as distinct  
19      receptor-ligand combinations diverged through an asymmetrical process whereby one  
20      variant has retained the same recognition specificity as the (now extinct) ancestor, while the  
21      other has functionally diverged and now represents a novel specificity no longer recognized  
22      by the ancestor. Examination of the structural determinants of the shift in binding specificity  
23      suggests that allosteric changes may be an important source of evolutionary novelty in this  
24      highly diversified receptor-ligand system.

25

## 26 **Introduction**

27 A central goal of biology is to understand the evolutionary forces and molecular processes by  
28 which new traits and functions emerge in living organisms. A major challenge toward this  
29 goal is that many cellular processes rely on interactions between molecular partners  
30 (protein-protein interactions or regulatory interactions between e.g. transcription factors  
31 and their binding sites; Boyle et al., 2017; Courtier-Orgogozo et al., 2019) rather than on the  
32 action of individual components in isolation. At present, the overall structure of protein-  
33 protein or regulatory interaction networks is just starting to be deciphered at the genome  
34 level in a handful of model organisms, and a general understanding of how the  
35 diversification of these networks led to the emergence of new biological functions in distinct  
36 lineages is crucially lacking (Andreani and Guerois 2014; Nooren and Thornton 2003). In two-  
37 components genetic systems, specificity of the interaction can be very tight such as e.g. in  
38 receptor-ligand interactions (Laub & Goulian, 2007) or bacterial toxin-antitoxin systems  
39 (Aakre et al., 2015). In these systems, the emergence of novel traits involves evolutionary  
40 modification of the interacting partners, leading to potential disruption of the interaction or  
41 to detrimental cross-talk, at least transiently (Plach et al., 2017). A central aspect of the  
42 diversification process therefore concerns the functional nature of the evolutionary  
43 intermediate. Two main scenarios have been proposed (Aakre et al., 2015). The first scenario  
44 posits that a functional change results from introduction of a mutation that first modifies  
45 one of the two partners, initially disrupting the functional interaction and leading to a non-  
46 functional intermediate. If fitness of this non-functional intermediate is not impaired too  
47 drastically, it may remain in the population until a compensatory mutation hits the second  
48 partner and rescues the interaction in a modified state, resulting in the novel function. An  
49 alternative scenario though, is that the first mutation may broaden rather than inactivate  
50 specificity of one of the two interacting partners, transiently releasing constraint on the  
51 other before specificity of the first partner becomes restricted again, thus maintaining  
52 functionality of the system all along the process. Distinguishing between these two scenarios  
53 requires functional characterization of the ancestral evolutionary intermediates, which has  
54 been achieved in a very limited number of biological cases such as bacterial toxin-antitoxin  
55 systems (Aakre et al., 2015), acquisition of cortisol specificity of the mammalian  
56 glucocorticoid receptor (Bridgham et al., 2009) or mammalian retinoic acid receptors

57 (Gutierrez-Mazariegos et al., 2016). The scenario of a promiscuous intermediate seems to  
58 have received better support, but whether this is a truly general pattern remains to be  
59 determined. A major limitation is that detailed population genetics models taking into  
60 account how natural selection is acting on variants of the two genes given their specific  
61 biological function are lacking for most genetic systems (Aakre et al., 2015; Aharoni et al.,  
62 2005; Bloom and Arnold 2009; Bridgham et al., 2009; Matsumura and Ellington 2001;  
63 Matton et al., 2000; Sayou et al., 2014).

64 Self-incompatibility (SI) in the flowering plants is a prime biological system to investigate  
65 how functional diversification can proceed between two molecular partners over the course  
66 of evolution. SI has evolved as a strategy to prevent selfing and enforce outcrossing, thereby  
67 avoiding the deleterious effects of inbreeding depression (Kitashiba and Nasrallah 2014;  
68 Nettancourt 1977). In *Brassicaceae*, SI is genetically controlled by a single multiallelic non-  
69 recombining locus called the S-locus (Nettancourt 1977). This locus encodes two highly  
70 polymorphic self-recognition determinant proteins: the female cell-surface ‘receptor’ S-  
71 LOCUS RECEPTOR KINASE (SRK) is expressed in stigmatic papillae cells (Takasaki et al., 2000)  
72 and the male ‘ligand’ S-LOCUS CYSTEIN RICH PROTEIN (SCR) is displayed at the pollen surface  
73 (Schopfer et al., 1999; Takasaki et al., 2000; Takayama et al., 2000). The SI response consists  
74 in pollen rejection by the pistil and is induced by allele-specific interaction between the SRK  
75 and SCR proteins when encoded by the same haplotype (S-haplotype, Kachroo et al., 2001;  
76 Nasrallah & Nasrallah, 1993; Takayama et al., 2001). These two interacting proteins exhibit a  
77 high degree of sequence variability and a large number of these highly diverged allelic  
78 variants segregate in natural populations of SI species (several dozens to nearly two  
79 hundreds, Busch et al., 2014; Castric & Vekemans, 2004; Lawrence, 2000). This large allelic  
80 diversity of receptor-ligand combinations must have arisen through repeated diversification  
81 events, but the molecular process and evolutionary scenario involved in the diversification of  
82 an ancestral haplotype into distinct descendant specificities are still unresolved.

83 Three evolutionary scenarios for emergence of new self-incompatibility specificities have  
84 been proposed so far (Charlesworth et al., 2005). The “compensatory mutation” scenario  
85 posits that diversification proceeds through self-compatible intermediates i.e. following  
86 transient disruption of the receptor-ligand interaction (Fig S1A, Gervais et al., 2011;  
87 Uyenoyama et al., 2001). Population genetic analysis confirmed that S-allele diversification is

88 indeed possible through this scenario, but only under some combinations of model  
89 parameters (high inbreeding depression, high rate of self-pollination and low number of co-  
90 segregating S-alleles, Gervais et al., 2011). Under these restrictive conditions, the ancestral  
91 recognition specificity can be maintained in the long run along with the derived specificity,  
92 effectively resulting in allelic diversification. A second scenario was presented by Chookajorn  
93 et al., (2004), who proposed instead that diversification resulted from the progressive  
94 reinforcement of SRK/SCR recognition capacity among slight functional variants of *SCR* and  
95 *SRK* that might segregate within the population. This model assumes no SC intermediate, but  
96 predicts rapid functional divergence along allelic lineages. A similar « replacement »  
97 dynamics was indeed observed by Gervais et al., (2011), whereby the introduced self-  
98 compatible intermediate excluded its functional ancestor from the population under a large  
99 portion of the parameter space, such that secondary introduction of the compensatory  
100 mutation effectively resulted in the turnover of recognition specificities along allelic lines  
101 rather than in diversification *per se*. In this model, a turnover of recognition specificities may  
102 therefore be expected along each allelic lineage, rather than their long-term maintenance  
103 over evolutionary times (Fig S1B). A third scenario was proposed by Matton et al. (1999) and  
104 involves a dual-specificity intermediate (Fig S1C). This scenario was criticized on population  
105 genetics arguments because such a dual-specificity haplotype would recognize and reject  
106 more potential mates for reproduction than its progenitor haplotype resulting in lower  
107 reproductive success, and should therefore be disfavoured by natural selection and quickly  
108 eliminated from the populations (Charlesworth 2000; Uyenoyama and Newbigin 2000).  
109 Overall, while the large allelic diversity at the S-locus is one of the most striking features of  
110 this system, the evolutionary scenario and molecular route by which new S-alleles arise  
111 remain largely unknown. An essential limitation in the field is the crucial absence of direct  
112 experimental approaches.

113

114

## 115 **Results**

116 To conclusively contrast these models we used ancestral sequence reconstruction of S-  
117 haplotypes that are currently segregating in the plant *Arabidopsis halleri*. Ancestral sequence  
118 reconstruction is a new approach to resurrect ancestral biological systems, whereby the

119 sequence of an ancestral gene or allele is determined through phylogenetic analyses, then  
 120 synthesized *de novo* and its functional properties (in terms of *e.g.* biochemical activity,  
 121 conformation or binding capacity) are compared to those of its contemporary descendants.  
 122 Although most S-haplotypes in *A. halleri* are typically so highly diverged that even sequence  
 123 alignment can be challenging, previous work identified a specific pair of S-haplotypes (S03  
 124 and S28) with high phylogenetic proximity based on a fragment of the *SRK* gene (Castric et  
 125 al., 2008). We took this opportunity to reconstruct, resurrect and phenotypically  
 126 characterize their last common ancestral receptor SRKa (“a” for ancestor, Fig 1) into *A.*  
 127 *thaliana*, which has previously been established as a model plant for mechanistic studies of  
 128 SI (Nasrallah et al., 2002; Tsuchimatsu et al., 2010).

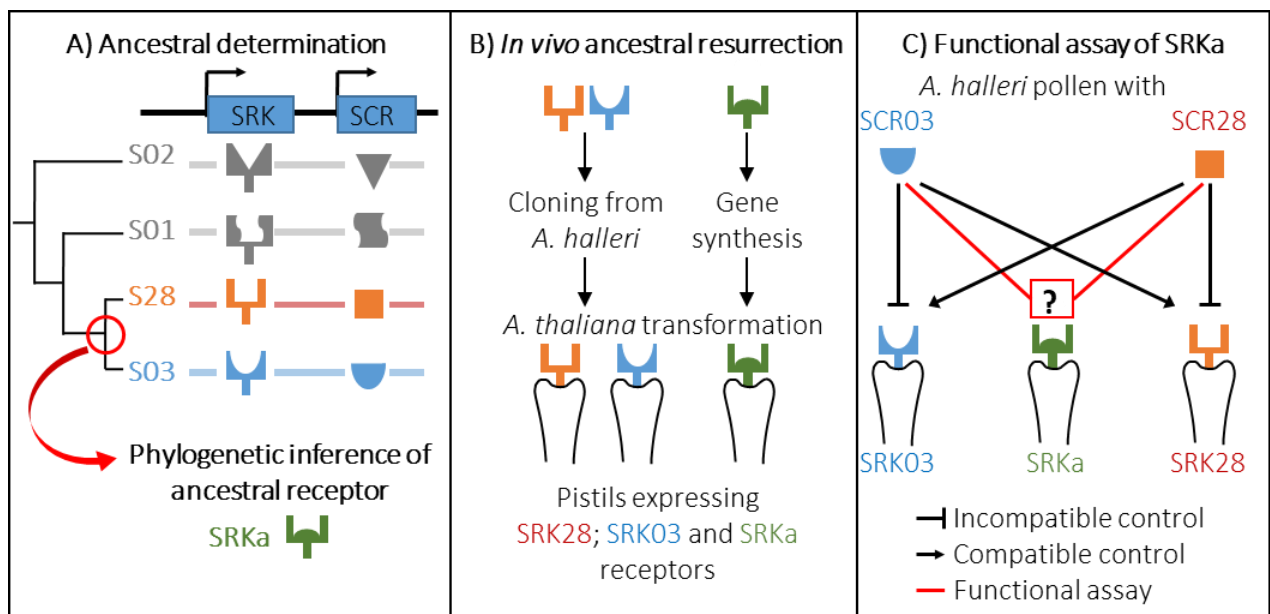

129  
 130 **Figure 1: Experimental approach for the ancestral resurrection experiment.** (A) The sequence of the common  
 131 ancestor of SRK03 and SRK28 was inferred by a phylogenetic approach using codon-based models implemented  
 132 in PAML. Four different versions of SRKa were defined due to inference uncertainty at two aa positions. (B)  
 133 SRK03 and SRK28 sequences were cloned from *A. halleri* DNA BAC clones, whereas SRKa sequences were  
 134 obtained by gene synthesis. (C) Representation of the controlled cross program to decipher the specificity of  
 135 SRKa.

136  
 137 **Expression of S03 and S28 recognition specificities in *A. thaliana* by genetic transformation**  
 138 Because of their relatively high sequence similarity, we first ensured that the S03 and S28  
 139 recognition specificities are indeed phenotypically distinct when expressed in *A. thaliana*. It  
 140 was previously shown that the self-compatible model plant *A. thaliana* can mount a  
 141 functional self-incompatibility response upon introduction of the S-locus genes *SCR* and *SRK*

142 (Boggs et al., 2009; Durand et al., 2014; Nasrallah et al., 2002) but it is unclear whether  
 143 transfer is possible for all *SCR* and *SRK* variants. We first assessed the activity of *AhSRK03* and  
 144 *AhSRK28* promoters in transformed *A. thaliana* lines (Fig S2), which enabled us to identify  
 145 the temporal window of *SRK* expression (Fig S3). Then, we used *A. halleri* pollen carrying  
 146 either the S03 or S28 male determinant to validate that a proper SI response was indeed  
 147 successfully transferred in transformed *A. thaliana* lines for each of our *SRK* receptors, and  
 148 that this response was strictly specific toward either of their cognate ligand (two replicate  
 149 transgenic lines for SRK03 and SRK28 each, Figure 2).

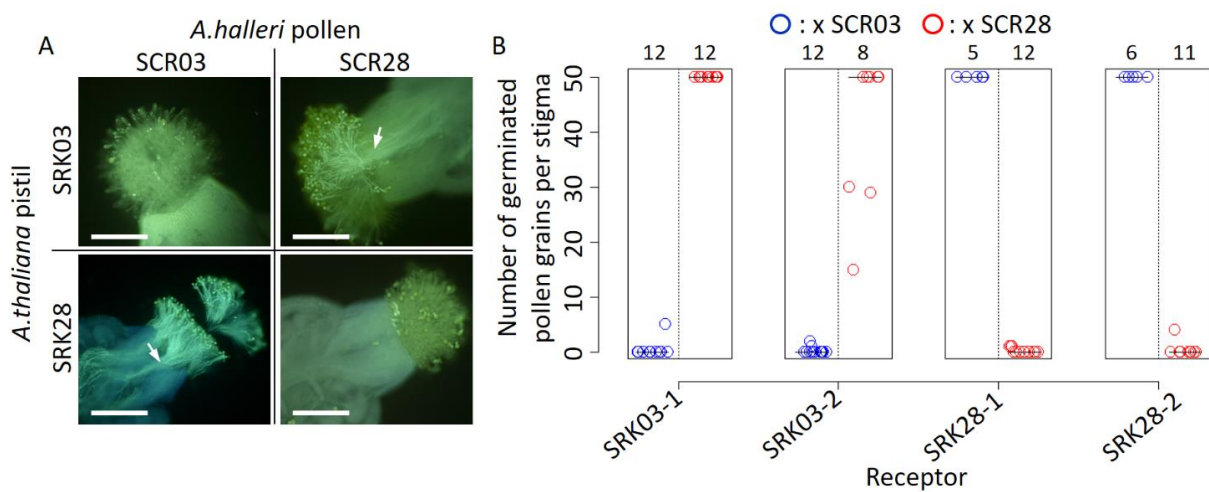

150  
 151 **Figure 2: SRK03 and SRK28 are successfully expressed in *A. thaliana* and represent phenotypically distinct**  
 152 **female recognition specificities.** (A) Fluorescence microscopic observation of pistils from SRK-transformed *A.*  
 153 *thaliana* plants pollinated with S03 and S28 pollen from *A. halleri*. A robust self-incompatibility reaction is  
 154 observed between cognate alleles, whereas a compatible reaction is observed between non-cognate alleles.  
 155 White arrows indicate pollen tubes that germinated in the stigma, and are specific to compatible reactions. Bar  
 156 = 0.3 mm. (B) Number of germinated pollen grains per stigma after pollination. Two SRK03 and SRK28 lines  
 157 were pollinated with *A. halleri* pollen expressing either S03 (blue) or S28 (red) specificities. The number of  
 158 pollinated pistils for each pollination assay is indicated on the top of the figure. The median value for each cross  
 159 is represented by a horizontal bar.

160  
 161 Abundant germination of pollen tubes occurred in crosses involving non-cognate SRK and  
 162 SCR proteins, whereas crosses involving proteins from the same S-haplotype induced  
 163 inhibition of pollen germination, which is characteristic of an incompatible response.  
 164 Intensity of the incompatible response was then quantified by counting the number of  
 165 germinated pollen grains at the pistil surface of two selected lines for each transgene (Fig  
 166 2A, 2B). Incompatible responses are characterized by less than 10 germinated pollen tubes

167 whereas compatible crosses induced significant pollen germination with more than 50 pollen  
168 tubes per stigma. Hence, we demonstrate both that cross-species pollinations of *A. thaliana*  
169 with *A. halleri* pollen are able to induce a robust SI reaction, and also that S03 and S28 are  
170 currently fully distinct recognition specificities despite their close phylogenetic proximity.

171

#### 172 *Phylogeny-based ancestral SRK reconstruction*

173 We then used a phylogenetic approach to reconstruct the sequence of the most recent  
174 common ancestor of *SRK03* and *SRK28* (Fig S4). Based on a set of closely related *SRK*  
175 sequences from *Arabidopsis* and *Capsella*, we used the best fitting codon-based models  
176 implemented in PAML (Yang 2007) to reconstruct the most likely ancestral amino acid  
177 sequence (*SRKa<sup>IA</sup>*). For the vast majority of amino acid residues where *SRK03* and *SRK28*  
178 differ, the ancestral reconstruction had high posterior probability (>0.95), but was more  
179 uncertain at four positions (Fig S5). Two of these sites were close (208) or within (305) hyper  
180 variable regions known to be functionally important (Fig S4, Kusaba et al., 1997). To take this  
181 uncertainty into account and evaluate the impact of variation at these individual sites, three  
182 additional ancestral sequences were generated and tested: *SRKa<sup>IG</sup>*, *SRKa<sup>MA</sup>* and *SRKa<sup>MG</sup>*. To  
183 avoid context-dependent effects, each of these four versions of *SRKa* was then surrounded  
184 by a promoter and a kinase sequence corresponding either to the native *SRK03*  
185 (*p03\_SRKa\_k03*) or the native *SRK28* (*p28\_SRKa\_k28*) variant. For each of these constructs,  
186 we obtained several replicate transgenic lines, resulting in a total of 28 different fixed  
187 homozygote single-copy transformed *Arabidopsis* lines (8 *SRKa<sup>IA</sup>* lines; 7 *SRKa<sup>IG</sup>* lines; 7  
188 *SRKa<sup>MA</sup>* lines and 6 *SRKa<sup>MG</sup>* lines). Five lines showed very low levels of *SRKa* transcripts in  
189 pistils (Fig S6; possibly due to positional effects as is common in transgenic constructs) and  
190 were thus excluded from further analysis.

191

#### 192 *Ligand specificity of the ancestral SRK*

193 We then evaluated the recognition phenotype conferred by these resurrected ancestral *SRK*  
194 sequences by performing controlled pollination assays for all remaining 23 *SRKa* lines with  
195 pollen from *A. halleri* S03, *A. halleri* S28 and *A. thaliana* C24 (used as a control to validate  
196 receptivity of the acceptor pistil). The SI reaction was scored as the number of germinated  
197 pollen grains per stigma. All 23 tested ancestral lines showed intense pollen germination



198 with C24 pollen, indicating that transgene integration in itself did not impair pistil fertility or  
 199 ability to receive pollen (Fig 3 and Fig S7).

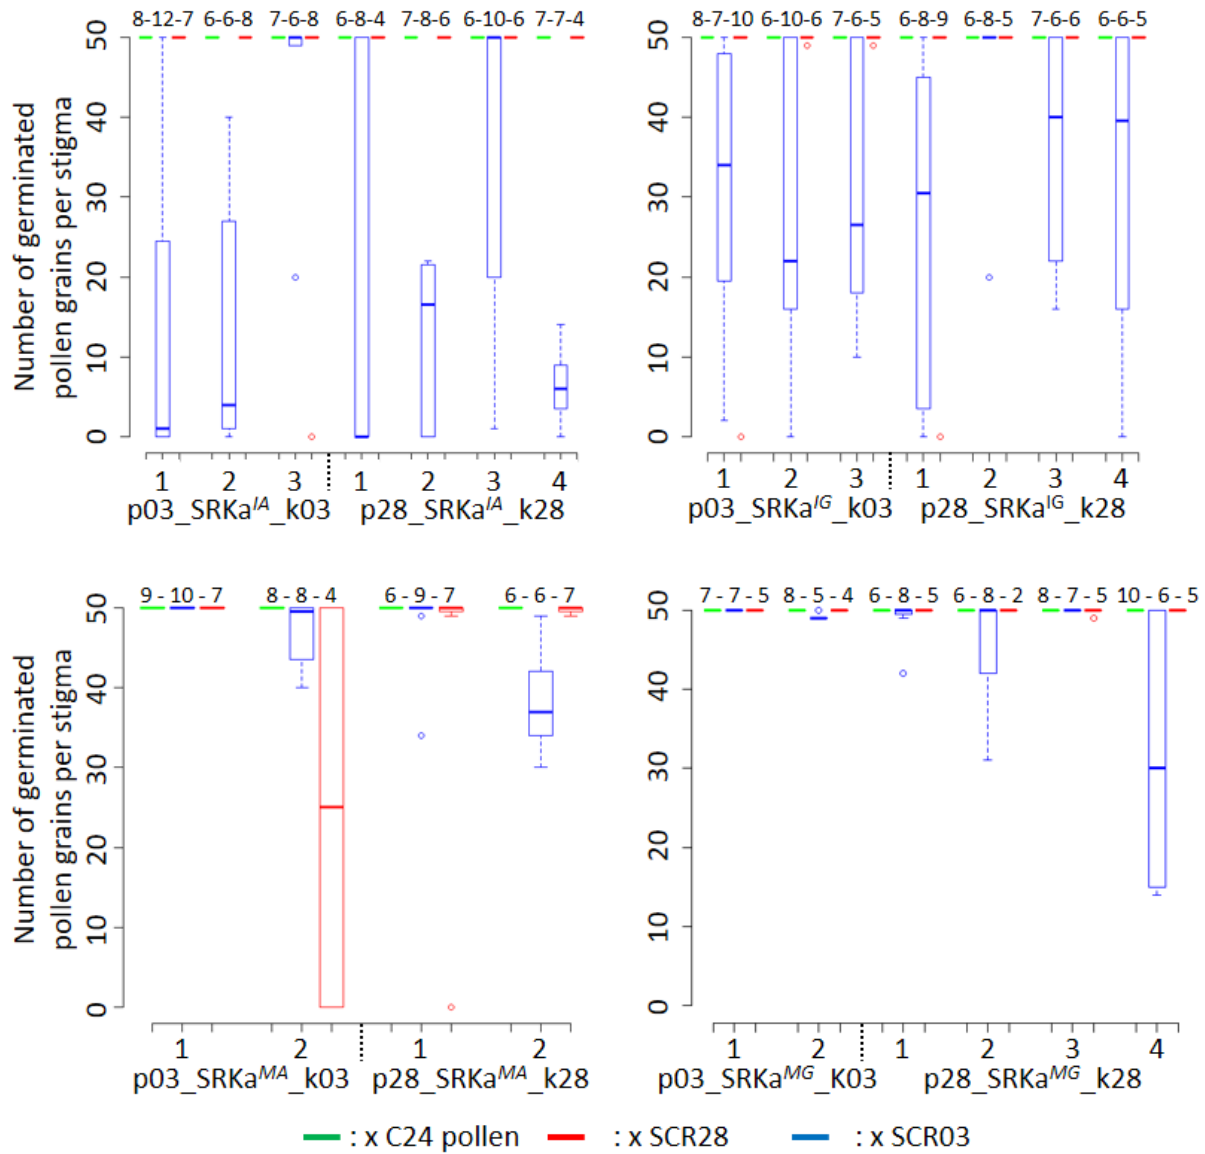

200 : x C24 pollen : x SCR28 : x SCR03  
 201 **Figure 3: Incompatibility response of SRKa lines.** Each SRKa line was pollinated with *A. thaliana* C24 (green), *A.*  
 202 *halleri* S03 (blue) and S28 (red) pollen. The number of replicate pollinated pistils is indicated above each boxplot.  
 203 The horizontal bar represents the median, the box delimitates the 25 and 75% percentiles, the bottom and top  
 204 whiskers both represent 25% extreme percentiles and outliers are represented by individual dots.

205  
 206 With a single exception (line p03\_SRKa<sup>MA</sup>\_k03\_2), S28 pollen induced no consistent SI  
 207 rejection in any of the lines expressing the different versions of the ancestral receptor, and  
 208 was indistinguishable from the compatible control (C24, Fig 3). In stark contrast, SCR03  
 209 pollen induced robust incompatibility reactions in the vast majority (12 of 14) of the



210 ancestral lines with amino-acid I at position 208 ( $SRK\alpha^I$  and  $SRK\alpha^G$ , Fig 3). Hence, we  
211 conclude that the S03 haplotype has retained the ancestral recognition specificity largely  
212 unaltered, while the S28 haplotype underwent substantial modification and represents a  
213 novel recognition specificity, leading to functional diversification.

214 Reactivity of ancestral lines was largely independent of the sequence context into which we  
215 introduced the different versions of the ancestral S-domain (Fig S3). Similarly, the identity of  
216 amino acid 305 of the reconstructed sequence had no impact on the response, as lines with  
217 either A or G produced rejection reactions in equal proportions. In contrast, only four of the  
218 lines with amino acid M at position 208 ( $SRK\alpha^{MA}$  and  $SRK\alpha^{MG}$ ) displayed incompatibility  
219 reactions, and these reactions were weak (Fig 3). Hence, substitution of a single amino acid  
220 at position 208 (I to M), seems to be sufficient to almost fully inactivate receptivity of the  
221 ancestral receptor towards SCR03.

222

### 223 *Structural determinants of SRK specificity*

224 We next sought to identify the structural determinants of the S03 and S28 specificities. We  
225 used the structural model of the interaction complex formed by SCR and SRK (Ma et al.,  
226 2016) to compare cognate and non cognate complexes in terms of number and nature of  
227 atomic contacts and predict how the ancestral receptor is expected to interact with either  
228 SCR03 or SCR28. As previously demonstrated by Ma et al. (2016), SCR binding induces  
229 homodimerization of the extracellular domain of SRK (eSRK) forming eSRK:SCR  
230 heterotetramers composed of two SCR molecules bound to two SRK molecules (Ma et al.,  
231 2016). The switch in recognition specificity occurred along the branch leading to  $SRK28$ , and  
232 therefore must involve some of the 29 amino acid differences along this branch. In contrast,  
233 the 31 amino acid differences that accumulated along the branch leading to  $SRK03$  have not  
234 fully altered the recognition specificity. Overall, we find a slightly higher number of atomic  
235 contacts between the SCR and SRK molecules in the  $SRK03$ -SCR03 cognate complex (1,543  
236 contacts over 91 and 62 distinct SRK and SCR amino acids respectively) than in the  $SRK28$ -  
237 SCR28 cognate complex (1,395 contacts over 89 and 57 distinct SRK and SCR amino acids  
238 respectively, Table S1). As already noted by Ma et al. (2016) in Brassica and in line with the  
239 distribution of positively selected sites along the sequence (Castric and Vekemans 2007), in

240 both cases the interaction interface was mostly concentrated around the three  
241 “hypervariable” portions of the SRK protein (Fig 4).

242

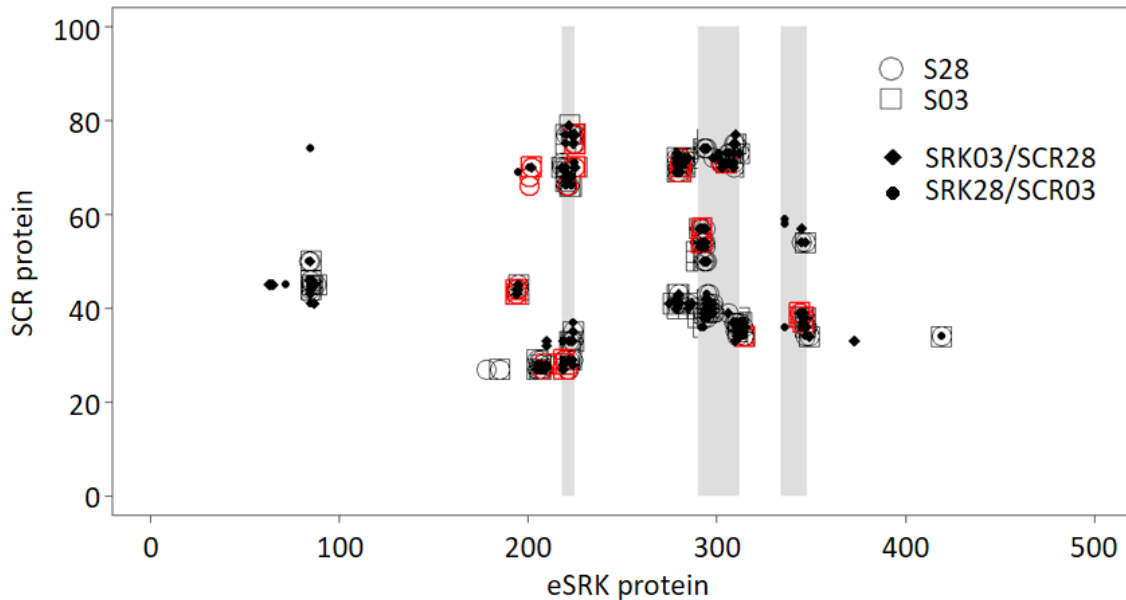

243

244 **Figure 4: Map of atomic contacts from structural modelling of S03 and S28 complexes.** The X and Y axis  
245 represent the eSRK and SCR protein respectively. Open circles and squares represent amino-acids contacts  
246 between eSRK and SCR proteins in cognate S03 and S28 complexes respectively. Red symbols represent SRK  
247 amino-acids that differ between SRK03 and SRK28. Full diamonds and dots correspond to amino-acids contacts  
248 in non-cognate SRK03/SCR28 and SRK28/SCR03 complexes respectively. Hypervariable regions 1, 2 and 3 of  
249 eSRK are represented by vertical grey bars at position 219-225, 290-312 and 334-348 respectively (Ma et al.,  
250 2016).

251

252 Contrary to our expectation however, the non-cognate complexes did not differ substantially  
253 from the cognate complexes on the basis of their total number of atomic contacts (Fig 4).  
254 Specifically, the SRK03/SCR28 and SRK28/SCR03 non-cognate complexes were predicted to  
255 establish a total of 1,546 and 1,328 contacts, respectively, between atoms of their SCR and  
256 SRK molecules, very close to the 1,543 and 1,395 predicted contacts for the SRK03/SCR03  
257 and SRK28/SCR28 cognate complexes (Table S1). They were also not characterized by any  
258 obvious steric clashes that would prevent the proper docking of SCR and SRK. Hence, the  
259 overall stability of the complex does not seem to be the primary determinant of recognition  
260 specificity. Consequently, the specificity of the interaction must be a function of some  
261 qualitative features rather than of the quantitative strength of the interaction.

262 While the majority of amino-acids retained unchanged atomic contacts in cognate vs. non-  
263 cognate interactions, using a 5% threshold we identified six amino-acids positions of the  
264 eSRK protein that displayed important differences in terms of contacts they establish with  
265 SCR in the cognate vs. the non-cognate complexes (Fig S8B, S8C, S8E and S8F). Four of these  
266 amino-acids positions also displayed very contrasted interactions in the S03 vs. the S28  
267 complexes (residues S201, R220, R279, W296, Fig S8A and S8D). For instance, the R residue  
268 at position 279 of SRK establishes three times more contacts with SCR in the SRK03/SCR03  
269 than in the SRK28/SCR28 complex (Fig 5, Fig S8A). These four residues are therefore prime  
270 candidates for the determination of binding specificity. Intriguingly, three of the six amino-  
271 acids were identical between SRK03 and SRK28, and yet interacted in sharply different ways  
272 with their respective SCR ligands. For instance, while identical between the SRK03 and SRK28  
273 sequences, residues W296 and R279 established three to four times more contacts in the  
274 S03 than in the S28 complex, and the R220 residue is involved in twice as many contacts in  
275 the S28 than in the S03 complex (Fig 5, Fig S8A). This suggests that involvement of these  
276 residues in the activity of the complex is mediated by substitutions at other positions along  
277 the protein sequence, for instance by displacing them spatially (Fig 5).  
278

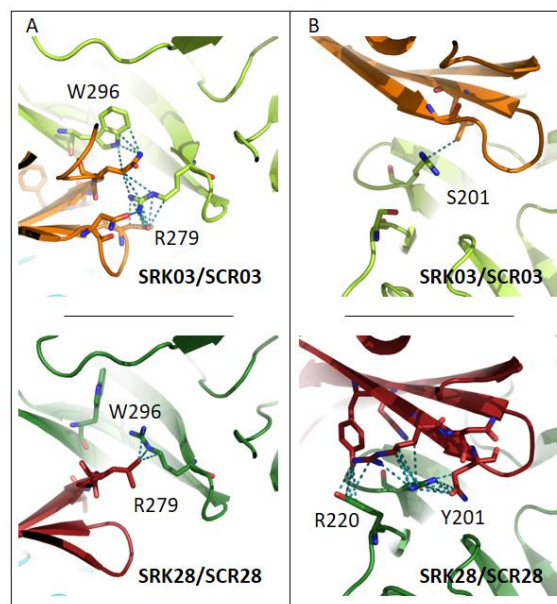

279  
280 **Figure 5: Four amino-acid residues establish contrasted patterns of atomic contacts between SCR and SRK in**  
281 **the two cognate complexes.** In (A), residues R279 and W296 of eSRK establish a large number of atomic  
282 contacts with SCR in the S03 complex (upper panel), but a very low number of contacts in the S28 complex  
283 (lower panel). The situation is reversed in (B), where residues S201 and R220 of eSRK establish a large number  
284 of atomic contacts with SCR in the S28 complex (lower panel), but a very low number of contacts in the S03

285 complex (upper panel). SRK chains are coloured in light and dark green for SRK03 and SRK28, respectively; SCR  
 286 chains are coloured in orange and red for SCR03 and SCR28, respectively. Amino acid residues are shown in stick  
 287 representation, with dotted lines indicating atom pair contacts below 4 Å, excluding hydrogen atoms. Note that  
 288 for clarity a more stringent threshold was used to define atomic contacts here (4 Å) than in Fig S8 and S9 (where  
 289 a 5 Å threshold was used for a more comprehensive analysis), but the results are qualitatively similar.

290

291 We then compared the predicted binding features of the functional form of the ancestral  
 292 receptor (SRK<sup>IA</sup>) with both SRK03 and SRK28. When complexed with SCR03, 46 SRK<sup>IA</sup>  
 293 interacting pairs of amino acids were identical with SRK03, whereas only 24 were identical  
 294 with SRK28. Similarly, when complexed with SCR28, 37 SRK<sup>IA</sup> interacting pairs of amino acid  
 295 residues were identical with SRK03, but only 18 were identical with SRK28 (Fig 6). This trend  
 296 is also visible at the level of individual atomic contacts and at the level of involved amino  
 297 acids both in SRK and SCR molecules (Fig S9). Hence, even though there is no quantitative  
 298 difference in how strongly SRK03 and SRK28 bind SCR03 and SCR28 (Table S1), the amino  
 299 acids that come into contact in the two complexes are not identical, and the contacts  
 300 established by SRK<sup>IA</sup> with SCR qualitatively resemble more those established by SRK03 than  
 301 those established by SRK28.

302

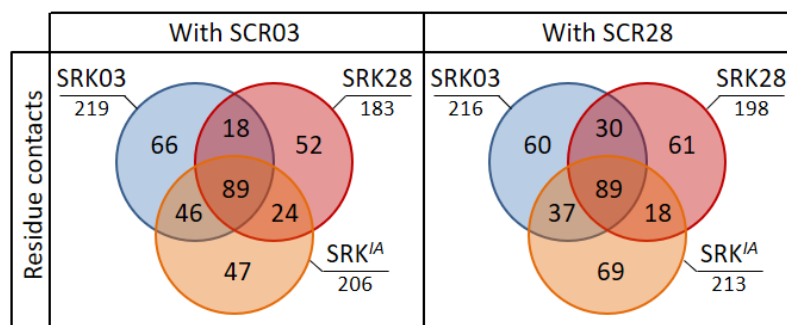

303

304 **Figure 6: Comparison of predicted binding properties of SRK03, SRK28 and SRK<sup>IA</sup> receptors when forming a**  
 305 **complex with either the SCR03 or the SCR28 ligand.** Residues in contact between SRK<sup>IA</sup> and SCR are more  
 306 often also in contact between SRK03 and SCR than between SRK28 and SCR. The Venn diagram indicates the  
 307 number of contacts between amino acid residues that are shared or specific across variants of the SRK receptor  
 308 and SCR.

309

310 Overall, asymmetrical diversification of the ancestor into the phenotypically distinct S03 and  
 311 S28 specificities is therefore associated with structural changes of the SRK receptor and the  
 312 way it interacts with its SCR ligand. Despite similar levels of overall sequence divergence

313 between SRKa and either SRK03 or SRK28, the binding properties of SRK03 have remained  
314 similar to those of SRKa<sup>A</sup>, while in contrast the way SRK28 is predicted to interact with the  
315 SCR ligand has diverged from its ancestral state, consistent with the phenotypic switch that  
316 has occurred along this lineage.

317

## 318 **Discussion**

319 Receptor-ligand interactions are widespread and biologically important, yet the processes by  
320 which they become diversified in the course of evolution have remained poorly understood.  
321 Here, using an ancestral resurrection approach, we showed that the receptor controlling the  
322 female SI recognition specificity in *A. halleri* evolved asymmetrically by accumulation of  
323 specificity-altering mutations along a single lineage, leaving the other descendent lineage  
324 functionally unchanged. We identify structural modifications of the receptor-ligand complex  
325 that are associated with this functional divergence.

326 **Ancestral resurrection in a higher organism.** Ancestral resurrection approaches have been  
327 successfully used to decipher evolutionary processes in a number of biological systems  
328 including enzymes (Starr, Picton, and Thornton 2017; Tufts et al., 2015), visual pigments  
329 (Chang et al., 2002) or transcription factors (Pougach et al., 2014). However, an essential  
330 limitation in these studies is that the ancestral protein function is typically determined *in*  
331 *vitro*, strongly limiting biological realism of the reconstructed function. To our knowledge, a  
332 single study conducted a comparable *in vivo* ancestral resurrection approach in a higher  
333 organism, in the context of functional evolution of the alcohol dehydrogenase protein (ADH)  
334 in *Drosophila* lineages (Siddiq et al., 2017). Such whole organism studies are biologically  
335 more relevant, as they allow to focus on integrated phenotypes (here the self-  
336 incompatibility reaction, which has a strong and direct link with organismal fitness) rather  
337 than on highly reductionist phenotypes (such as *in vitro* assays of protein activity).

338 **Asymmetrical structural and functional divergence.** Functional diversification of receptor-  
339 ligand interactions is a common process that takes place over long evolutionary times.  
340 However, in most cases we remain far from a predictive understanding of how the specific  
341 evolutionary forces imposed on a given interacting pair of proteins at the molecular level  
342 translate into a given process of functional diversification. As a result, little is known about  
343 how diversification happens in Nature, both in terms of whether some evolutionary

344 pathways are preferentially followed over others and in terms of the molecular  
345 modifications involved. Here, by focusing on the SI system of *A. halleri*, we demonstrate  
346 conservation of recognition specificity between an ancestral SRK receptor and one of its two  
347 descendant lineages (S03), while pollen from the other descendant lineage (S28) triggered  
348 no substantial SI response when deposited on pistils expressing the ancestral specificity.  
349 Hence, S-allele diversification of the two S-alleles from their common ancestor proceeded  
350 through asymmetrical functional divergence, with one allele having largely retained its  
351 ancestral specificity and the other one having acquired a novel recognition specificity that  
352 was previously absent. In analogy with macroevolution models, the diversification of S-locus  
353 specificities thus seems to proceed through cladogenetic change rather than anagenetic  
354 change (e.g. Goldberg & Igic, 2012).

355 Overall, our results thus unambiguously reject two previously proposed models of SI  
356 specificity diversification. The model of gradual divergence of pairwise SRK-SCR affinities  
357 along lineages (Chookajorn et al., 2004) is rejected because both descendent alleles would  
358 have been functionally distinct from the ancestor. The model of promiscuous dual-specificity  
359 intermediates (Matton et al., 1999) is rejected because Uyenoyama & Newbigin (2000) have  
360 shown that a dual-specificity haplotype can be maintained in the population only in the  
361 absence of the ancestral specificity, while we show here that the ancestral specificity (S03)  
362 was indeed present. In contrast, the remaining scenario (in which diversification proceeds  
363 through transient self-compatible intermediates; Gervais et al., 2011; Uyenoyama et al.,  
364 2001) is compatible with our observation of long-term maintenance of functional  
365 specificities.

366 **Long-term maintenance of SI specificity rather than rapid turnover.** Models of SI evolution  
367 suggested that turnover of recognition specificities may be common over evolutionary times  
368 (Gervais et al., 2011). The observation that the ancestral SRKa<sup>IA</sup> recognition specificity was  
369 stably maintained along the SRK03 lineage, demonstrates that no turnover event occurred  
370 over a substantial period of time (i.e. since S03 and S28 started to diverge from one another,  
371 *ca.* a few million years ago). The long-term maintenance of S-haplotype specificities was  
372 previously hinted by the comparison of chosen *A. halleri* and *A. lyrata* S-lineages with their  
373 *A. thaliana* orthologs. Specifically, some *A. thaliana* accessions with haplogroup A were able  
374 to reject *A. halleri* pollen expressing the cognate AhSCR04 specificity (Tsuchimatsu et al.,



375 2010), despite about 6 million years of divergence (Hohmann et al., 2015). Similarly, an  
376 overexpressed version of *A. thaliana* SCR haplogroup C was also able to elicit a SI reaction on  
377 pistils expressing the cognate *A. lyrata* AISRK36 specificity (Dwyer et al., 2013). However,  
378 beside the fact that these were trans-specific comparisons, *A. thaliana* has become a  
379 predominant selfer due to alterations of SI components (Bechsgaard et al., 2006; Shimizu  
380 and Tsuchimatsu 2015), so our results provide the first direct test of the hypothesis that  
381 recognition specificities remain stable rather than undergo rapid and recurrent turnover.

382 Despite the obvious conservation of recognition specificity between SRKa<sup>A</sup> and SRK03, we  
383 note that the SI response towards the reconstructed SRKa was overall weaker and more  
384 variable across replicate lines than towards the native SRK constructs. A first possibility is  
385 that this partial response is due to uncertainty in the ancestral receptor reconstruction.  
386 Ancestral reconstruction is based on probabilistic inference, and our results show that a  
387 single amino acid modification (I vs M at position 208) can entirely compromise the SI  
388 response. It is therefore possible that the resurrected ancestor had a partly diminished  
389 capacity to elicit the SI reaction because of imperfect reconstruction. A second possibility  
390 however, is that this partial response is due to parallel changes to the SCR ligand, suggesting  
391 that amino acid substitutions occurring between SRKa and SRK03 have fine-tuned the  
392 SRK03/SCR03 interaction. Resurrection of the ancestral SCRa ligand will now be needed to  
393 solve this issue.

#### 394 **Structural determinants of the shift in binding specificity of a receptor-ligand interaction.**

395 Structural modelling of the cognate vs non-cognate complexes suggested that specificity of  
396 the receptor/ligand interaction depends on qualitative features rather than quantitative  
397 strength of the interaction. In other words, a ligand is predicted to bind its non-cognate just  
398 as well as its cognate receptor, but it only activates the proper one by interacting with a  
399 different set of amino acid residues at the binding interface. The importance of such  
400 allosteric activation has been discussed in the context of protein-protein interactions (Kang  
401 et al., 2015) as well as of the binding of transcription factors to their DNA binding sites  
402 (Gronemeyer and Bourguet 2009) and may be a general feature of molecular interfaces (Ma  
403 et al., 2010). In our system, the model of allosteric activation points to a limited number of  
404 amino-acid residues encoding recognition specificity and will now need to be tested by  
405 direct measurements of binding affinity, in line with Ma et al. (2016). Specifically, it will be



406 interesting to determine experimentally whether the allosteric model proposed here also  
407 applies to more divergent pairs of SCR-SRK variants, which are more typical of the SI system  
408 given the long-term maintenance of this balanced polymorphism.

409

## 410 **Materials and Methods**

### 411 *Phylogeny-based ancestral SRK resurrection*

412 **Sequence collection:** In order to reconstruct the ancestral sequence of the *AhSRK28* and  
413 *AhSRK03* SRK alleles, we first collected 17 full or partial sequences of the *SRK* first exon  
414 belonging to the haplogroup B/2. Seven allele sequences belonged to *A. halleri* (*AhSRK03*,  
415 *AhSRK08*, *AhSRK09*, *AhSRK19*, *AhSRK23*, *AhSRK27*, *AhSRK28*), six to *A. lyrata* (*AISRK06*,  
416 *AISRK08*, *AISRK14*, *AISRK18*, *AISRK29*, *AISRK39*) and four to *Capsella grandiflora* (*CgrSRK1*,  
417 *CgrSRK4*, *CgrSRK5*, *CgrSRK6*). For the *AhSRK19*, *AhSRK23* and *AhSRK27* alleles the *SRK* exon1  
418 partial sequence was supplemented by Sanger sequencing. We added three sequences from  
419 the *SRK* haplogroup A3/3 as outgroups (*AhSRK04*, *AhSRK10*, *AhSRK29*). Accession numbers  
420 for the sequences are reported in Table S2. After preliminary analyses and in order to obtain  
421 a well-supported phylogenetic tree we removed three fast evolving sequences: *CgrSRK6*,  
422 *AhSRK08* and *AISRK29*.

423 **Phylogenetic analysis:** Sequences were aligned with MACSE v1.2 (Ranwez et al., 2011).  
424 Based on the 1338 base pairs alignment, SRK phylogenetic trees were built with both  
425 Maximum Likelihood (ML) (PHYML 3.0, Guindon et al., 2010) and Bayesian methods  
426 (MrBayes 3.2.4, Ronquist & Huelsenbeck, 2003). For the ML analysis the model used was  
427 chosen according to jModelTest 2.1.10 (Darriba et al., 2012) using the Bayesian Information  
428 Criterion (BIC) (TPM3uf+ $\Gamma$ ). Node stability was estimated by 100 non-parametric bootstrap  
429 replicates (Felsenstein 1985). For the Bayesian inference (BI), a codon model with a GTR+ $\Gamma$ +I  
430 model of substitution was used; two runs of four Markov chains were calculated  
431 simultaneously for 400,000 generations with initially equal probabilities for all trees and a  
432 random starting tree. Trees were sampled every 10 generations, and the consensus tree  
433 with posterior probabilities was calculated after removal of a 25% burn-in period. The  
434 average standard deviation of split frequencies between the two independent runs was  
435 lower than 0.01. The resulting topology was used to infer *SRK $\alpha$*  (Fig S10).

436 **Ancestral SRK reconstruction:** The ancestral reconstruction was conducted with the codeml  
437 program of the PAML 4.8 package (Yang 2007) under six different models: M0, M0-  
438 FMutSel0, M0-FMutSel, M3, M3-FMutSel0, M3-FMutSel. M0 refers to a one-ratio model,  
439 which assumes a single  $\omega$  ( $d_n/d_s$ ) across branches and sites (Goldman and Yang 1994),  
440 whereas M3 allows  $\omega$  to vary across sites according to a discrete distribution (with 2 or 3  
441 categories depending on the models) (Yang et al., 2000). The mutation-selection models  
442 incorporate parameters for mutation bias, with (FMutSel) or without (FMutSel0) selection on  
443 synonymous rate (Yang and Nielsen 2008). Models were compared using Likelihood Ratio  
444 Tests (LRT) and Akaike Information Criteria (AIC). The best fitting-model was found to be  
445 M3FMutSel (Table S3), therefore the ancestral amino acid sequence reconstructed with this  
446 model was used to generate transgenic lines (SRK<sup>IA</sup>). The ancestral amino acids inferred with  
447 the three “M3” models were identical except for three sites with relatively lower probability:  
448 33 (A or V), 208 (I or M) and 305 (A or G) (Fig S5). Two of these sites were close (208) or  
449 within (305) hyper variable regions and therefore potentially functionally important. To take  
450 into account these uncertainties, three additional transgenic lines were generated with a  
451 different SRKa and tested: SRK<sup>IG</sup>, SRK<sup>MA</sup> and SRK<sup>MG</sup>, in order to evaluate all four  
452 combinations of two amino acids at these two sites.

453

#### 454 *Generation and selection of A. thaliana transgenic lines*

455 We generated 12 series of *A. thaliana* C24 transgenic plants (*AhSRK03*; *AhSRK28*;  
456 *AhSRK03p:GFP*; *AhSRK28p:GFP*; *p03\_SRKa<sup>IA</sup>\_k03*; *p28\_SRKa<sup>IA</sup>\_k28*; *p03\_SRKa<sup>IG</sup>\_k03*;  
457 *p28\_SRKa<sup>IG</sup>\_k28*; *p03\_SRKa<sup>MA</sup>\_k03*; *p28\_SRKa<sup>MA</sup>\_k28*; *p03\_SRKa<sup>MG</sup>\_k03* and  
458 *p28\_SRKa<sup>MG</sup>\_28*). All DNA amplifications were performed with the primeSTAR<sup>®</sup> DNA  
459 polymerase (Takara, Japan) and all constructs were validated by SANGER sequencing. We  
460 used gateway vectors<sup>®</sup> (Life Technologies, USA) for expression of transgenes in *A. thaliana*.  
461 *AhSRK03*, *AhSRK28*, *proAhSRK03* and *proAhSRK28* were amplified using attB1 and attB2  
462 containing primers (Table S4) from BAC sequences of *A. halleri* S03 and S28 (KJ772378-  
463 KJ772385 and KJ461475-KJ461478 respectively, Goubet et al., 2012). Amplification products  
464 were inserted by BP recombination into the pDONR 221 plasmid. Promoters *proAhSRK03*  
465 and *proAhSRK28* designed for *p03\_SRKa\_k03* and *p28\_SRKa\_k28* constructs respectively  
466 were amplified with attB4 and attB1r containing primers (Table S4). Amplification products

467 were inserted by BP recombination into a pENTR-P4-P1R plasmid. Kinase domains of  
468 AhSRK03 and AhSRK28 were amplified with attB2r and AttB3 containing primers (Table S4).  
469 Amplification products were inserted by BP recombination into a pENTR-P2R-P3 plasmid.  
470 Constructs expressing native SRK (*AhSRK03* and *AhSRK28*) and GFP expressing constructs  
471 (*AhSRK03p:GFP* and *AhSRK28p:GFP*) were generated by LR reaction between entry clones  
472 and the destination vectors pK7WG or pKGWFS7.0. SRKa constructs were generated by LR  
473 triple recombination into the pK7m34GW destination vector with i) attL4 and attR1  
474 promoters entry clones, ii) synthesized ancestral S-domain surrounded by attL1 and attL2  
475 sequences and iii) attR2 and attL3 kinase domain entry clones. Details of the molecular  
476 constructs are displayed in Fig S11. *A. thaliana* plants were grown under 16h/20°C day,  
477 8h/18°C night and 70 % humidity greenhouse conditions. When plants displayed  
478 approximately 20 flowers, transformation was performed by *Agrobacterium tumefaciens*-  
479 mediated floral deep according to Logemann et al., 2006). After seeds harvesting, single  
480 insertion homozygous lines were selected *via* multiple rounds of antibiotic selection on  
481 selective medium as described in Zhang et al., 2006).

482

#### 483 *Microscopy*

484 GFP expression in *AhSRK03p:GFP* and *AhSRK28p:GFP* and the results of cross pollination  
485 experiment were monitored under UV light using an Axio imager 2 microscope (Zeiss,  
486 Oberkochen, Germany) coupled with a HXP120 Light source (LEJ, Jena, Germany). Pictures  
487 were taken with an Axiocam 506 color camera (Zeiss, Oberkochen, Germany) and read with  
488 the Zeiss ZEN 2 core software package. For GFP expression, floral buds, pieces of leaves and  
489 floral hamp cross sections from *AhSRK03p:GFP* and *AhSRK28p:GFP* were observed. For  
490 pollination assays, the number of germinated pollen grains per stigma was counted after  
491 aniline blue staining up to 50 pollen tubes.

492

#### 493 *Aniline blue staining*

494 To evaluate the SI response of transgenic lines, floral buds of developmental stage 9-11 were  
495 emasculated at day-1. At day-2, they were pollinated with frozen *A. halleri* pollen expressing  
496 S03 or S28 specificity. Pistils were harvested 6h after pollination and fixed in FAA (4 %  
497 formaldehyde, 4 % acetic acid, ethanol) overnight. On day-4, pollinated stigmas were

498 washed three times in water, incubated 30 min in NaOH 4M at room temperature, washed  
499 three times in water and conserved for 30 min in the last bath. Finally, pistils were incubated  
500 overnight in aniline blue ( $K_3PO_4$  0.15 M, 0.1 % aniline blue) and mounted between  
501 microscopic slides at day-5.

502

### 503 *Expression analysis*

504 RNA extraction was performed onto stages 11-14 floral buds with the nucleospin RNA Plus  
505 Extraction kit (Macherey Nage, GmbH & Co. DE). For each line, floral buds were harvested  
506 onto three different individuals. cDNA synthesis was performed using RevertAid Reverse  
507 Transcriptase (Thermo Fisher Scientific, Massachusetts, USA). 1 $\mu$ g of extracted RNA was  
508 mixed with 0.2 $\mu$ g of Random hexamer primer, psq H<sub>2</sub>O 12.5 $\mu$ L. After incubation at 65°C, 4 $\mu$ L  
509 of 5X reaction buffer; 0,5 $\mu$ L of Riboblock RNase inhibitor (Thermo Fisher Scientific,  
510 Massachusetts, USA), 10 mM of each dNTP and 200 U of RevertAid Reverse Transcriptase  
511 were added and incubated firstly at 25 °C and then 10 min at 42 °C. cDNA quantification was  
512 performed in triplicate using LightCycler 480 Instrument II (Roche molecular systems, Inc,  
513 Pleasanton, USA). cDNA amplification of *SRK* fragments was performed with forward primer  
514 located on the S-domain (For: AGGAATGTGAGGAGAGGTGC) and the reverse primer located  
515 on the second exon (Rev: TCCTACTGTTGTTGTTGCCC). According to Liu et al. (2007),  
516 Ubiquitin was used as housekeeping gene (For: CTGAGCCGGACAGTCCTCTTAACTG; Rev:  
517 CGGCGAGGCGTGTATACATTTGTG).

518

### 519 *Interacting protein modelling*

520 All structural models were created using MODELLER (Fiser, Do, and Šali 2000; Šali and  
521 Blundell 1993), applying a template-based docking approach with the eSRK9:SCR9 X-Ray  
522 structure (Ma et al., 2016) as reference. Input sequence alignments were created using  
523 multiple sequence alignments of all relevant SRK sequences and of all relevant SCR  
524 sequences. The resulting models were subsequently optimized using the  
525 GalaxyRefineComplex web service (Heo, Lee, and Seok 2016).

526 The top models for each receptor-ligand pair were then considered and the number of  
527 atomic contacts between chains was counted using a 5 Å atom-atom cut-off. Hydrogen  
528 atoms were excluded from the calculation. Visualization was done, and for clarity images

529 were made with a 4 Å atom-atom cut-off using the PyMol molecular graphics system,  
530 version 1.7.2.1, Schrodinger LLC.

531

### 532 **Acknowledgements**

533 This research received support through a grant from the European Research Council (NOVEL  
534 project, grant #648321). The authors thank the French Ministère de l'Enseignement  
535 Supérieur et de la Recherche, the Hauts de France Region and the European Funds for  
536 Regional Economical Development for their financial support to this project.

537

### 538 **References**

- 539 Aakre, Christopher D., Julien Herrou, Tuyen N. Phung, Barrett S. Perchuk, Sean Crosson, and  
540 Michael T. Laub. 2015. "Evolving New Protein-Protein Interaction Specificity through  
541 Promiscuous Intermediates." *Cell* 163(3):594–606.
- 542 Aharoni, Amir, Leonid Gaidukov, Olga Khersonsky, Stephen McQ Gould, Cintia Roodveldt,  
543 and Dan S. Tawfik. 2005. "The 'evolvability' of Promiscuous Protein Functions." *Nature*  
544 *Genetics* 37(1):73–76.
- 545 Andreani, Jessica and Raphael Guerois. 2014. "Evolution of Protein Interactions: From  
546 Interactomes to Interfaces." *Archives of Biochemistry and Biophysics* 554:65–75.
- 547 Bechsgaard, Jesper S., Vincent Castric, Deborah Charlesworth, Xavier Vekemans, and Mikkel  
548 H. Schierup. 2006. "The Transition to Self-Compatibility in *Arabidopsis Thaliana* and  
549 Evolution within S-Haplotypes over 10 Myr." *Molecular Biology and Evolution*  
550 23(9):1741–50.
- 551 Bloom, Jesse D. and Frances H. Arnold. 2009. "In the Light of Directed Evolution: Pathways of  
552 Adaptive Protein Evolution." *Proceedings of the National Academy of Sciences of the*  
553 *United States of America* 106 Suppl:9995–10000.
- 554 Boggs, Nathan A., Kathleen G. Dwyer, Paurush Shah, Amanda A. McCulloch, Jesper  
555 Bechsgaard, Mikkel H. Schierup, Mikhail E. Nasrallah, and June B. Nasrallah. 2009.  
556 "Expression of Distinct Self-Incompatibility Specificities in *Arabidopsis Thaliana*."  
557 *Genetics* 182(4):1313–21.
- 558 Boyle, Evan A., Yang I. Li, and Jonathan K. Pritchard. 2017. "An Expanded View of Complex  
559 Traits: From Polygenic to Omnigenic." *Cell* 169(7):1177–86.

- 560 Bridgham, Jamie T., Eric A. Ortlund, and Joseph W. Thornton. 2009. "An Epistatic Ratchet  
561 Constrains the Direction of Glucocorticoid Receptor Evolution." *Nature* 461(7263):515–  
562 19.
- 563 Busch, Jeremiah W., Tyler Witthuhn, and Michael Joseph. 2014. "Fewer S-Alleles Are  
564 Maintained in Plant Populations with Sporophytic as Opposed to Gametophytic Self-  
565 Incompatibility." *Plant Species Biology* 29(1):34–46.
- 566 Castric, Vincent, Jesper Bechsgaard, Mikkel H. Schierup, and Xavier Vekemans. 2008.  
567 "Repeated Adaptive Introgression at a Gene under Multiallelic Balancing Selection."  
568 *PLoS Genetics* 4(8).
- 569 Castric, Vincent and Xavier Vekemans. 2004. "Plant Self-Incompatibility in Natural  
570 Populations: A Critical Assessment of Recent Theoretical and Empirical Advances."  
571 *Molecular Ecology* 13(10):2873–89.
- 572 Castric, Vincent and Xavier Vekemans. 2007. "Evolution under Strong Balancing Selection:  
573 How Many Codons Determine Specificity at the Female Self-Incompatibility Gene SRK in  
574 Brassicaceae?" *BMC Evolutionary Biology* 7:132.
- 575 Chang, B. S., K. Jonsson, M. A. Kazmi, M. J. Donoghue, and T. P. Sakmar. 2002. "Recreating a  
576 Functional Ancestral Archosaur Visual Pigment." *Molecular Biology and Evolution*  
577 19(9):1483–89.
- 578 Charlesworth, Deborah. 2000. "How Can Two-Gene Models of Self-Incompatibility Generate  
579 New Specificities ? Evolutionary Dynamics of Dual-Specificity Self-Incompatibility  
580 Alleles." 12(March):309–17.
- 581 Charlesworth, Deborah, Xavier Vekemans, Vincent Castric, and Sylvain Glémin. 2005. "Plant  
582 Self-Incompatibility Systems: A Molecular Evolutionary Perspective." *New Phytologist*  
583 168(1):61–69.
- 584 Chookajorn, Thanat, Aardra Kachroo, Daniel R. Ripoll, Andrew G. Clark, and June B.  
585 Nasrallah. 2004. "Specificity Determinants and Diversification of the Brassica Self-  
586 Incompatibility Pollen Ligand." *Proceedings of the National Academy of Sciences of the*  
587 *United States of America* 101(4):911–17.
- 588 Courtier-Orgogozo, Virginie, Laurent Arnoult, Stephane R. Prigent, Severine Wiltgen, and  
589 Arnaud Martin. 2019. "Gephebase, a Database of Genotype-Phenotype Relationships  
590 for Natural and Domesticated Variation in Eukaryotes." *BioRxiv* 618371.

- 591 Darriba, Diego, Guillermo L. Taboada, Ramón Doallo, and David Posada. 2012. "JModelTest  
592 2: More Models, New Heuristics and Parallel Computing - Supplementary Information."  
593 *Nature Methods* 9(8):772–772.
- 594 Durand, Eléonore, Raphaël Méheust, Marion Soucaze, Pauline M. Goubet, Sophie Gallina,  
595 Céline Poux, Isabelle Fobis-loisy, Eline Guillon, Thierry Gaude, Alexis Sarazin, Martin  
596 Figeac, Elisa Prat, William Marande, Hélène Bergès, Xavier Vekemans, Sylvain Billiard,  
597 and Vincent Castric. 2014. "Dominance Hierarchy Arising from the Evolution of a  
598 Complex Small RNA Regulatory Network." *Science* 346(6214):1200–1205.
- 599 Dwyer, Kathleen G., Martin T. Berger, Rimsha Ahmed, Molly K. Hritz, Amanda A. McCulloch,  
600 Michael J. Price, Nicholas J. Serniak, Leonard T. Walsh, June B. Nasrallah, and Mikhail E.  
601 Nasrallah. 2013. "Molecular Characterization and Evolution of Self-Incompatibility  
602 Genes in *Arabidopsis Thaliana*: The Case of the Sc Haplotype." *Genetics* 193(3):985–94.
- 603 Felsenstein, Joseph. 1985. "CONFIDENCE LIMITS ON PHYLOGENIES: AN APPROACH USING  
604 THE BOOTSTRAP." *Evolution; International Journal of Organic Evolution* 39(4):783–91.
- 605 Fiser, András, Richard Kihn Gian Do, and Andrej Šali. 2000. "Modeling of Loops in Protein  
606 Structures." *Protein Science* 9:1753–73.
- 607 Gervais, Camille E., Vincent Castric, Adrienne Ressayre, and Sylvain Billiard. 2011. "Origin and  
608 Diversification Dynamics of Self-Incompatibility Haplotypes." *Genetics* 188(3):625–36.
- 609 Goldberg, Emma E. and Boris Igic. 2012. "Tempo and Mode in Plant Breeding System  
610 Evolution." *Evolution* 66(12):3701–9.
- 611 Goldman, N. and Z. Yang. 1994. "A Codon-Based Model of Nucleotide Substitution for  
612 Protein-Coding DNA Sequences." *Molecular Biology and Evolution* 11(5):725–36.
- 613 Goubet, Pauline M., Hélène Bergès, Arnaud Bellec, Elisa Prat, Nicolas Helmstetter, Sophie  
614 Mangenot, Sophie Gallina, Anne Catherine Holl, Isabelle Fobis-Loisy, Xavier Vekemans,  
615 and Vincent Castric. 2012. "Contrasted Patterns of Molecular Evolution in Dominant  
616 and Recessive Self-Incompatibility Haplotypes in *Arabidopsis*." *PLoS Genetics* 8(3):16–  
617 20.
- 618 Gronemeyer, Hinrich and William Bourguet. 2009. "Allosteric Effects Govern Nuclear  
619 Receptor Action: DNA Appears as a Player." *Science Signaling*. 2, Pe34 2(73).
- 620 Guindon, Stéphane, Jean-François Dufayard, Vincent Lefort, Maria Anisimova, Wim Hordijk,  
621 and Olivier Gascuel. 2010. "New Algorithms and Methods to Estimate Maximum-



- 622 Likelihood Phylogenies: Assessing the Performance of PhyML 3.0." *Systematic Biology*  
623 59:307–21.
- 624 Gutierrez-Mazariegos, Juliana, Eswar Kumar Nadendla, Romain A. Studer, Susana Alvarez,  
625 Angel R. de Lera, Shigehiro Kuraku, William Bourguet, Michael Schubert, and Vincent  
626 Laudet. 2016. "Evolutionary Diversification of Retinoic Acid Receptor Ligand-Binding  
627 Pocket Structure by Molecular Tinkering." *Royal Society Open Science* 3(3):150484.
- 628 Heo, Lim, Hasup Lee, and Chaok Seok. 2016. "GalaxyRefineComplex: Refinement of Protein-  
629 Protein Complex Model Structures Driven by Interface Repacking." *Scientific Reports*  
630 6:32153.
- 631 Hohmann, Nora, Eva M. Wolf, Martin A. Lysak, and Marcus A. Koch. 2015. "A Time-  
632 Calibrated Road Map of Brassicaceae Species Radiation and Evolutionary History." *The*  
633 *Plant Cell* tpc.15.00482.
- 634 Kachroo, Aardra, Christel R. Schopfer, Mikhail E. Nasrallah, and June B. Nasrallah. 2001.  
635 "Allele-Specific Receptor-Ligand Interactions in Brassica Self-Incompatibility." *Science*  
636 293(5536):1824–26.
- 637 Kang, Hye Jin, Angela D. Wilkins, Olivier Lichtarge, and Theodore G. Wensel. 2015.  
638 "Determinants of Endogenous Ligand Specificity Divergence among Metabotropic  
639 Glutamate Receptors." *Journal of Biological Chemistry* 290(5):2870–78.
- 640 Kitashiba, Hiroyasu and June B. Nasrallah. 2014. "Self-Incompatibility in Brassicaceae Crops:  
641 Lessons for Interspecific Incompatibility." *Breeding Science* 64(1):23–37.
- 642 Kusaba, M., T. Nishio, Y. Satta, K. Hinata, and D. Ockendon. 1997. "Striking Sequence  
643 Similarity in Inter- and Intra-Specific Comparisons of Class I SLG Alleles from Brassica  
644 Oleracea and Brassica Campestris: Implications for the Evolution and Recognition  
645 Mechanism." *Proc Natl Acad Sci U S A* 94(14):7673–78.
- 646 Lawrence, M. J. 2000. "Population Genetics of the Homomorphic Self-Incompatibility  
647 Polymorphisms in Flowering Plants." *Annals of Botany* 85(SUPPL. A):221–26.
- 648 Liu, Pei, Susan Sherman-Broyles, Mikhail E. Nasrallah, and June B. Nasrallah. 2007. "A Cryptic  
649 Modifier Causing Transient Self-Incompatibility in *Arabidopsis Thaliana*." *Current*  
650 *Biology* 17(8):734–40.
- 651 Logemann, Elke, Rainer P. Birkenbihl, Bekir Ülker, and Imre E. Somssich. 2006. "An Improved  
652 Method for Preparing Agrobacterium Cells That Simplifies the Arabidopsis

- 653 Transformation Protocol." *Plant Methods* 2(1).
- 654 Ma, Buyong, Chung Jung Tsai, Yongping Pan, and Ruth Nussinov. 2010. "Why Does Binding of  
655 Proteins to DNA or Proteins to Proteins Not Necessarily Spell Function?" *ACS Chemical*  
656 *Biology* 5(3):265–72.
- 657 Ma, Rui, Zhifu Han, Zehan Hu, Guangzhong Lin, Xinqi Gong, Heqiao Zhang, June B. Nasrallah,  
658 and Jijie Chai. 2016. "Structural Basis for Specific Self-Incompatibility Response in  
659 Brassica." *Cell Research* 26(12):1320–29.
- 660 Matsumura, Ichiro and Andrew D. Ellington. 2001. "In Vitro Evolution of Beta-Glucuronidase  
661 into a Beta-Galactosidase Proceeds through Non-Specific Intermediates." *Journal of*  
662 *Molecular Biology* 305(2):331–39.
- 663 Matton, Daniel P., Doan Trung Luu, David Morse, and Mario Cappadocia. 2000. "Reply.  
664 Establishing A Paradigm for the Generation of New s Alleles." *Plant Cell* 12(3):313–16.
- 665 Matton, Daniel P., Doan Trung Luu, Qin Xike, Geneviève Laublin, Martin O'Brien, Olivier  
666 Maes, David Morse, and Mario Cappadocia. 1999. "Production of an S RNase with Dual  
667 Specificity Suggests a Novel Hypothesis for the Generation of New S Alleles." *The Plant*  
668 *Cell* 11(11):2087–97.
- 669 Nasrallah, J. B. and Mikhail E. Nasrallah. 1993. "Pollen Stigma Signaling in the Sporophytic  
670 Self- Incompatibility Response." *The Plant Cell* 5(10):1325–35.
- 671 Nasrallah, Mikhail E., Pei Liu, and June B. Nasrallah. 2002. "Generation of Self-Incompatible  
672 Arabidopsis Thaliana by Transfer of Two S Locus Genes from A. Lyrata." *Science*  
673 297(5579):10–13.
- 674 Nettancourt, D. D. 1977. "Incompatibility in Angiosperms. Springer Verlag, BerlinLDep." 3.
- 675 Nooren, Irene M. A. and Janet M. Thornton. 2003. "Diversity of Protein-Protein  
676 Interactions." *EMBO Journal* 22(14):3486–92.
- 677 Plach, Maximilian G., Florian Semmelmann, Florian Busch, Markus Busch, Leonhard  
678 Heizinger, Vicki H. Wysocki, Rainer Merkl, and Reinhard Sterner. 2017. "Evolutionary  
679 Diversification of Protein–Protein Interactions by Interface Add-Ons." *Proceedings of*  
680 *the National Academy of Sciences* 201707335.
- 681 Pougach, Ksenia, Arnout Voet, Fyodor A. Kondrashov, Karin Voordeckers, Joaquin F.  
682 Christiaens, Bianka Baying, Vladimir Benes, Ryo Sakai, Jan Aerts, Bo Zhu, Patrick Van  
683 Dijck, and Kevin J. Verstrepen. 2014. "Duplication of a Promiscuous Transcription Factor

- 684 Drives the Emergence of a New Regulatory Network.” *Nature Communications* 5.  
685 Ranwez, Vincent, Sébastien Harispe, Frédéric Delsuc, and Emmanuel J. P. Douzery. 2011.  
686 “MACSE: Multiple Alignment of Coding SEquences Accounting for Frameshifts and Stop  
687 Codons” edited by W. J. Murphy. *PLoS ONE* 6(9):e22594.  
688 Ronquist, Fredrik and John P. Huelsenbeck. 2003. “MrBayes 3: Bayesian Phylogenetic  
689 Inference under Mixed Models.” *Bioinformatics* 19(12):1572–74.  
690 Šali, Andrej and Tom L. Blundell. 1993. “Comparative Protein Modelling by Satisfaction of  
691 Spatial Restraints.” *Elsevier* 779–815.  
692 Sayou, Camille, Marie Monniaux, Max H. Nanao, Edwige Moyroud, Samuel F. Brockington,  
693 Emmanuel Thévenon, Hicham Chahtane, Norman Warthmann, Michael Melkonian,  
694 Yong Zhang, Gane Ka-Shu Wong, Detlef Weigel, François Parcy, and Renaud Dumas.  
695 2014. “A Promiscuous Intermediate Underlies the Evolution of LEAFY DNA Binding  
696 Specificity.” *Science (New York, N.Y.)* 343(6171):645–48.  
697 Schopfer, Christel R., Mikhail E. Nasrallah, and June B. Nasrallah. 1999. “The Male  
698 Determinant of Self-Incompatibility in Brassica.” *Science* 286(5445):1697–1700.  
699 Shimizu, Kentaro K. and Takashi Tsuchimatsu. 2015. “Evolution of Selfing: Recurrent Patterns  
700 in Molecular Adaptation.” *Annual Review of Ecology, Evolution, and Systematics*  
701 46(1):annurev-ecolsys-112414-054249.  
702 Siddiq, Mohammad A., David W. Loehlin, Kristi L. Montooth, and Joseph W. Thornton. 2017.  
703 “Experimental Test and Refutation of a Classic Case of Molecular Adaptation in  
704 *Drosophila Melanogaster*.” *Nature Ecology and Evolution* 1(2).  
705 Smyth, D. R., J. L. Bowman, and E. M. Meyerowitz. 1990. “Early Flower Development in  
706 *Arabidopsis*.” *Plant Cell* 2(8):755–67.  
707 Starr, Tyler N., Lora K. Picton, and Joseph W. Thornton. 2017. “Alternative Evolutionary  
708 Histories in the Sequence Space of an Ancient Protein.” *Nature* 549(7672):409–13.  
709 Takasaki, Takeshi, Katsunori Hatakeyama, Go Suzuki, Masao Watanabe, Akira Isogai, and  
710 Kokichi Hinata. 2000. “The S Receptor Kinase Determines Self-Incompatibility in Brassica  
711 Stigma.” *Nature* 403(6772):913–16.  
712 Takayama, Seiji, Hiroshi Shiba, Megumi Iwano, Kosuke Asano, Minoru Hara, F. S. Che, Masao  
713 Watanabe, Kokichi Hinata, and Akira Isogai. 2000. “Isolation and Characterization of  
714 Pollen Coat Proteins of Brassica Campestris That Interact with S Locus-Related

- 715 Glycoprotein 1 Involved in Pollen-Stigma Adhesion." *Proceedings of the National*  
716 *Academy of Sciences of the United States of America* 97(7):3765–70.
- 717 Takayama, Seiji, Hiroko Shimosato, Hiroshi Shiba, Miyuki Funato, Fang Sik Che, Masao  
718 Watanabe, Megumi Iwano, and Akira Isogai. 2001. "Direct Ligand-Receptor Complex  
719 Interaction Controls Brassica Self-Incompatibility." *Nature* 413(6855):534–38.
- 720 Tsuchimatsu, Takashi, Keita Suwabe, Rie Shimizu-Inatsugi, Sachiyo Isokawa, Pavlos Pavlidis,  
721 Thomas Städler, Go Suzuki, Seiji Takayama, Masao Watanabe, and Kentaro K. Shimizu.  
722 2010. "Evolution of Self-Compatibility in Arabidopsis by a Mutation in the Male  
723 Specificity Gene." *Nature* 464(7293):1342–46.
- 724 Tufts, Danielle M., Chandrasekhar Natarajan, Inge G. Revsbech, Joana Projecto-Garcia,  
725 Federico G. Hoffmann, Roy E. Weber, Angela Fago, Hideaki Moriyama, and Jay F. Storz.  
726 2015. "Epistasis Constrains Mutational Pathways of Hemoglobin Adaptation in High-  
727 Altitude Pikas." *Molecular Biology and Evolution* 32(2):287–98.
- 728 Uyenoyama, Marcy K. and Ed Newbigin. 2000. "Evolutionary Dynamics of Dual-Specificity  
729 Self-Incompatibility Alleles." *The Plant Cell Online* 12(3):310–312.
- 730 Uyenoyama, Marcy K., Yu Zhang, and E. Ed Newbigin. 2001. "On the Origin of Self-  
731 Incompatibility Haplotypes: Transition through Self-Compatible Intermediates."  
732 *Genetics* 157(4):1805–17.
- 733 Yang, Ziheng. 2007. "PAML 4: Phylogenetic Analysis by Maximum Likelihood." *Molecular*  
734 *Biology and Evolution* 24(8):1586–91.
- 735 Yang, Ziheng and Rasmus Nielsen. 2008. "Mutation-Selection Models of Codon Substitution  
736 and Their Use to Estimate Selective Strengths on Codon Usage." *Molecular Biology and*  
737 *Evolution* 25(3):568–79.
- 738 Yang, Ziheng, Rasmus Nielsen, Nick Goldman, and Anne-Mette Krabbe Pedersen. 2000.  
739 "Codonsubstitution Models for Heterogeneous Selection Pressure at Amino Acid Sites."  
740 *Genetics* 155:431–49.
- 741 Zhang, Xiuren, Rossana Henriques, Shih-Shun Lin, Qi-Wen Niu, and Nam-Hai Chua. 2006.  
742 "Agrobacterium-Mediated Transformation of *Arabidopsis Thaliana* Using the Floral Dip  
743 Method." *Nature Protocols* 1(2):641–46.
- 744  
745

746 Supplementary Materials for:

747

748 **Asymmetrical diversification of the receptor-ligand interaction controlling self-**  
749 **incompatibility in Arabidopsis.**

750 Chantreau Maxime<sup>1</sup>, Céline Poux<sup>1</sup>, Marc F. Lensink<sup>2</sup>, Guillaume Brysbaert<sup>2</sup>, Xavier Vekemans<sup>1</sup>  
751 & Vincent Castric<sup>1,3</sup>

752

753

754 <sup>1</sup> CNRS, Univ. Lille, UMR 8198—Evo-Eco-Paléo, F-59000 Lille, France

755 <sup>2</sup> Univ. Lille, CNRS, UMR 8576 UGSF, F-59000, France

756 <sup>3</sup> Corresponding author: [Vincent.Castric@univ-lille.fr](mailto:Vincent.Castric@univ-lille.fr)

757

758 This file includes

759 Figs S1 to S11

760 Tables S1 to S4

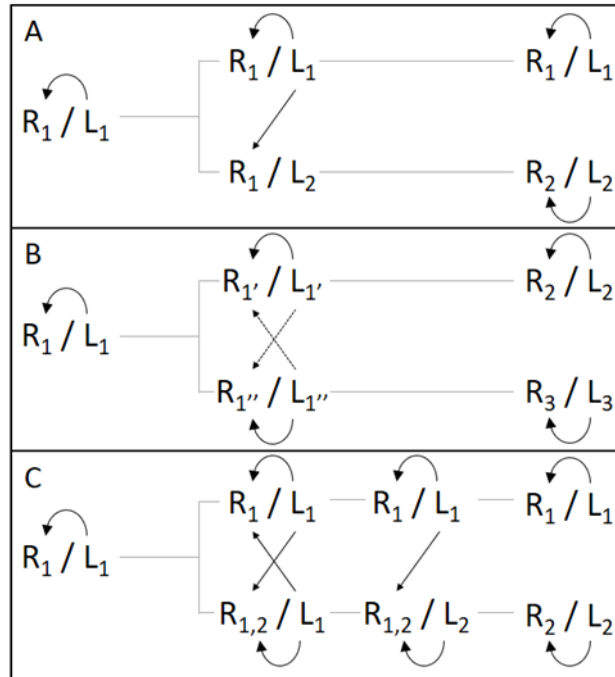

761

762 **Figure S1: Three models for the emergence of new self-incompatibility specificities. Docking interaction**

763 **between ligands and receptors are represented by oriented arrows. A. In the compensatory mutation model, a**

764 **non-functional self-compatible intermediate ( $R_1/L_2$ ) segregates transiently and is rapidly compensated, creating**

765 **a novel specificity ( $R_2/L_2$ ), while the ancestral one ( $R_1/L_1$ ) remains unchanged over time. B. In the turnover**

766 **model, slight functional variants with different affinity between them ( $R_1/L_1'$  and  $R_1''/L_1''$ ) segregate in the**

767 **population and give rise to new specificities ( $R_2/L_2$  and  $R_3/L_3$ ). Dotted lines correspond to weaker affinity**

768 **interactions. C. In the promiscuous model, the intermediate receptor ( $R_{1,2}$ ) has widened up its specificity**

769 **spectrum enabling it to recognize another potential ligand ( $L_2$ ) while maintaining its capacity to recognize its**

770 **original ligand ( $L_1$ ). Emergence of the new ligand then favours narrowing of specificity the dual-receptor ( $R_{1,2} \rightarrow$**

771  **$R_2$ )**

772

773

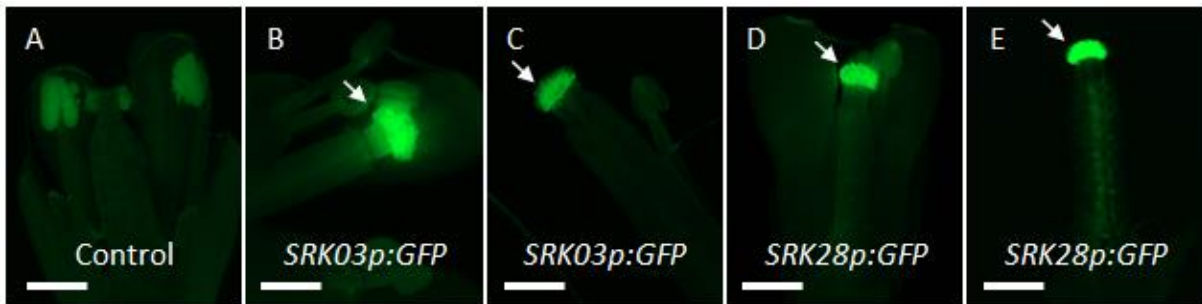

774

775 **Figure S2: Localization of SRK expression by GFP fluorescence microscopy.** (A) Flower of an untransformed plant  
776 (no SRK expression). (B,C) Flowers of two SRK03p:GFP transformed lines. (C,D) Flowers of two SRK28p:GFP  
777 transformed lines. Promoters of both SRK03 and SRK28 drive GFP expression specifically in stigmatic papillae  
778 cells (white arrows). Bar = 1mm.

779



780

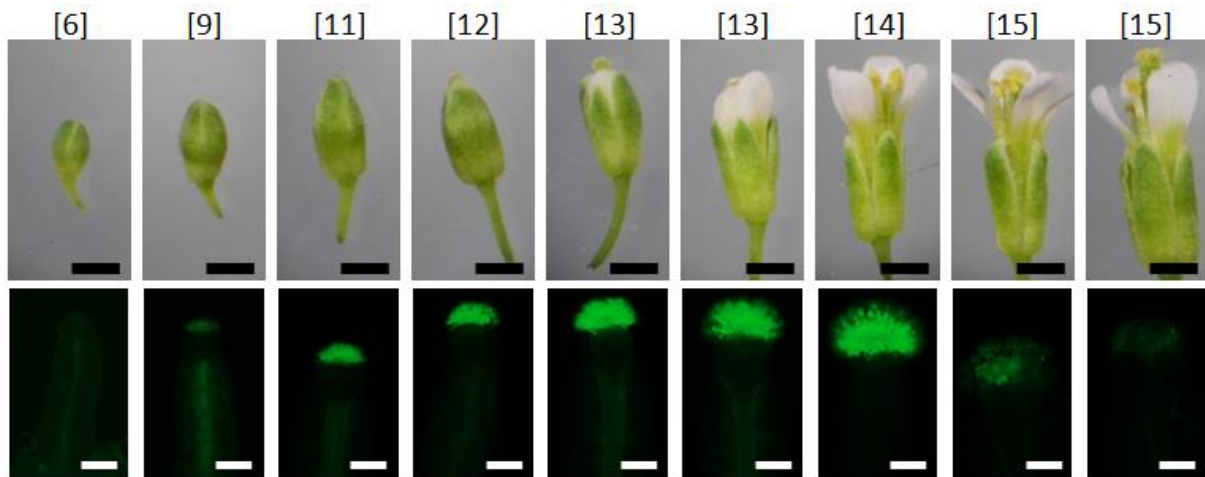

781

782 **Figure S3: Pattern of proSRK03 activity along development stages of floral buds.** Floral buds and pistils of  
783 SRK03p:GFP-transformed plants are observed under optical (above) and UV light (below), respectively.  
784 Developmental stages (Smyth et al., 1990) are indicated between brackets. SRK expression is located between  
785 stages 11 and 14, with a strong decrease of GFP fluorescence in mature flowers (old stage 15). Similar results  
786 were observed for the SRK28p:GFP lines (data not shown). No GFP signal was observed in any other part of the  
787 plant (inflorescence stems, leaves and non-reproductive floral organs, data not shown). Black bar = 1 mm, white  
788 bar = 0.5 mm.

789

790

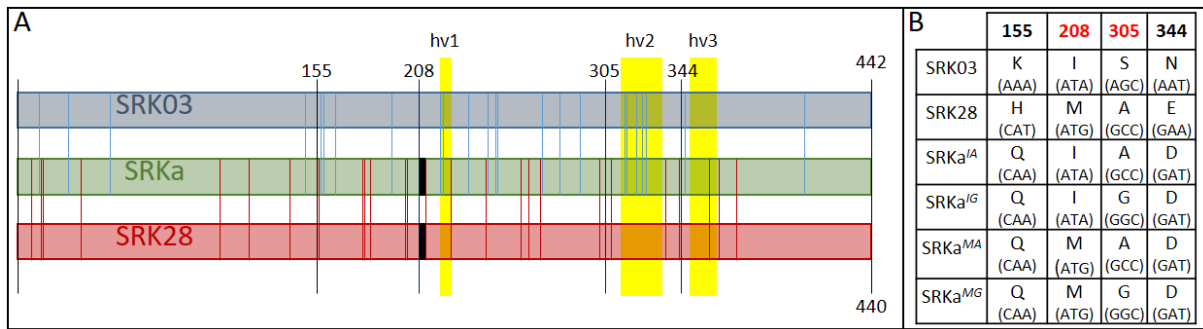

791

792 **Figure S4: Comparison between the S-domain of AhSRK03 and AhSRK28 and their common ancestor.** (A)  
 793 Protein schematic representation of the S-domain sequence of AhSRK03, AhSRK28 and their common ancestor  
 794 SRKa. Positions of identical amino acids between the three S-domains are not represented, positions of SRKa  
 795 amino acids specific to SRK03 and SRK28 are represented by a vertical blue and red line respectively. Positions of  
 796 hypervariable regions are represented by yellow rectangles. The position of the 2 amino acid gap presents in  
 797 both AhSRKa and AhSRK03 is represented by black rectangles. Positions 208 and 305 for which the  
 798 reconstruction was uncertain and positions 155 and 344 for which the aa identity is different in the two other  
 799 receptors are represented in black. (B) Amino acid identity and codon sequence (in parentheses) for these four  
 800 positions in the different SRK variants.

801

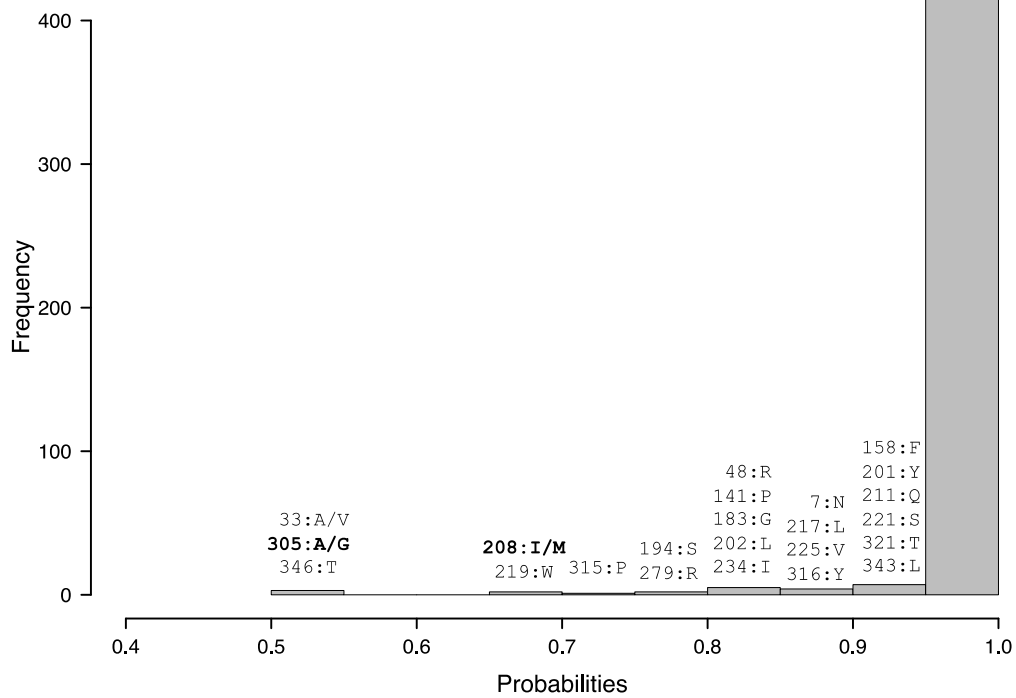

802

803

804 **Figure S5: Histogram presenting the distribution of amino acid (aa) probability values obtained with the best fitting-**  
 805 **model M3FMutSel. For each range of values smaller than 0.95, the nature and the position of the aa in the sequence are**  
 806 **given. At three sites (33, 208, 305) the models used for the inferences led to different results. The variable sites between the**  
 807 **4 ancestral sequences used for A. thaliana transformation are in bold.**

808

809

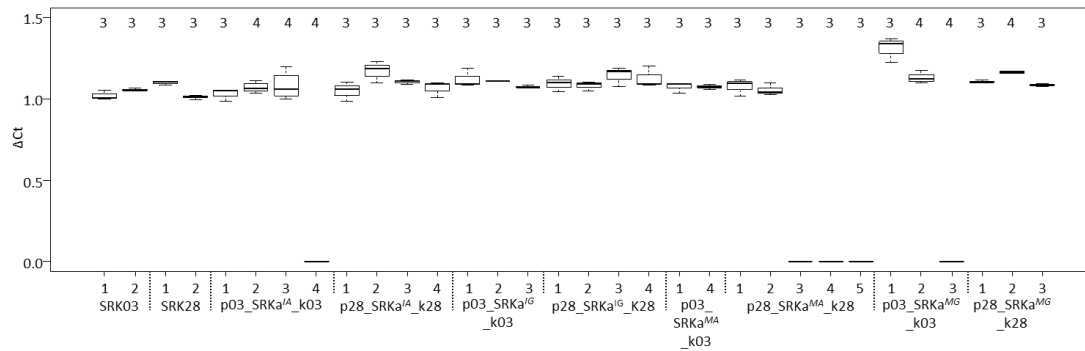

810

811 **Figure S6: Transgene expression analysis of the different SRK-transformed lines.**  $\Delta Ct$  (Cycle threshold) was

812 calculated as the ratio of Ct-SRK on Ct-Ubiquitin. The number of biological replicates is indicated above each

813 boxplot. For each biological replicate, measurements were realized in technical triplicates.

814

815

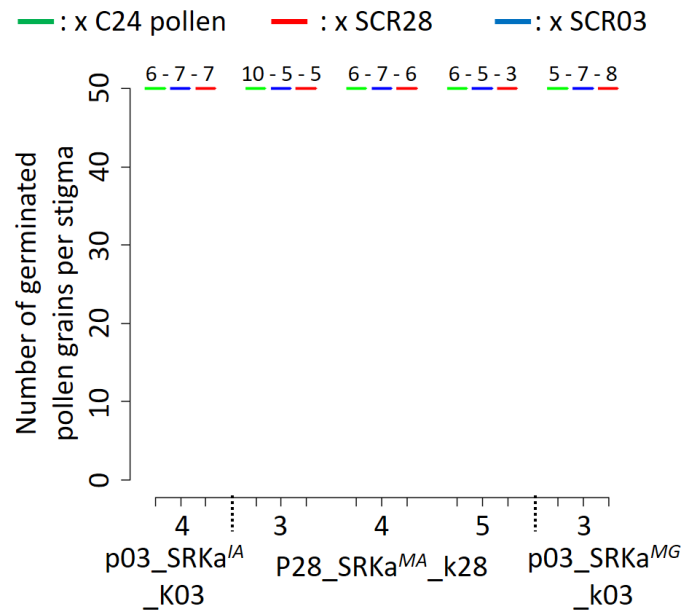

816

817 **Figure S7: Quantification of incompatibility response of *A. thaliana* lines with *SRKa* transcript levels below**

818 **detection threshold.** Each *SRKa* line in S03 and S28 context were pollinated with *A. thaliana* C24 (green), *A.*

819 *halleri* S03 (blue) and S28 (red) pollen. The number of pollinated pistils is indicated above each boxplot. These

820 five lines with an undetectable level of transcripts appear compatible with the three pollen types, which is in

821 agreement with the fact that they don't express any SI receptor at their membrane surface.

822

823

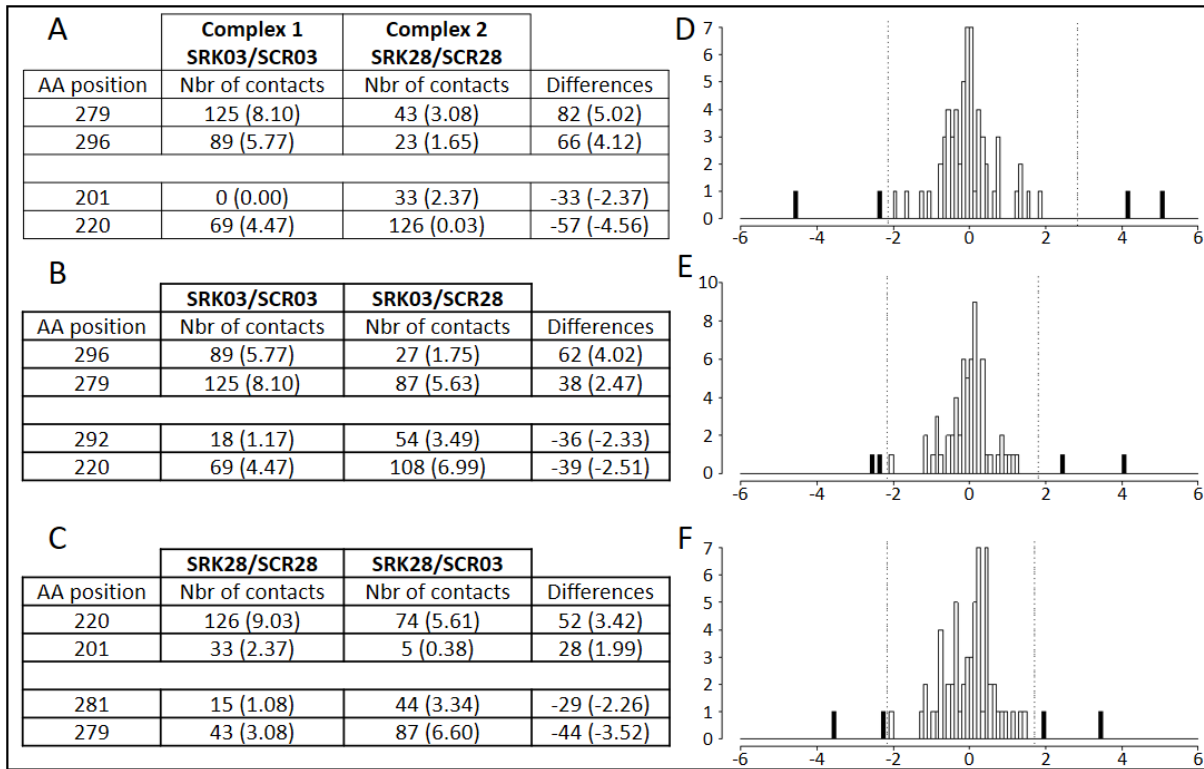

824

825 **Figure S8: Comparison of amino-acid contacts between the different SCR/SRK complexes points to amino**  
 826 **acids of SRK potentially involved in specificity of ligand recognition.** The number of atomic contacts between  
 827 amino-acids of the receptor and the ligand was compared between (A) the two cognate complexes  
 828 (SCR03/SRK03 vs SCR28/SRK28); (B) the cognate vs non-cognate complex established by SRK03 (SCR03/SRK03 vs  
 829 SCR28/SRK03) and (C) the cognate vs non-cognate complex established by SRK28 (SCR28/SRK28 vs  
 830 SCR03/SRK28). The three tables list amino-acid positions who establish the most extreme differences in atomic  
 831 interactions in each comparison, values in parentheses correspond to the proportion of contacts realized by  
 832 each aa independently ((number of contact in the complex / number of contact for one aa) x 100). The full  
 833 distributions are shown in panels (D), (E) and (F) as the difference of proportion of contacts realized by each aa  
 834 in both complexes. The vertical lines represent the 5% extreme values. Positive differences correspond to aa  
 835 involved in numerous contacts in complex 1 compare to complex 2 whereas negative differences correspond to  
 836 aa involved in numerous contact in complex 2 compare to complex 1.

837

838

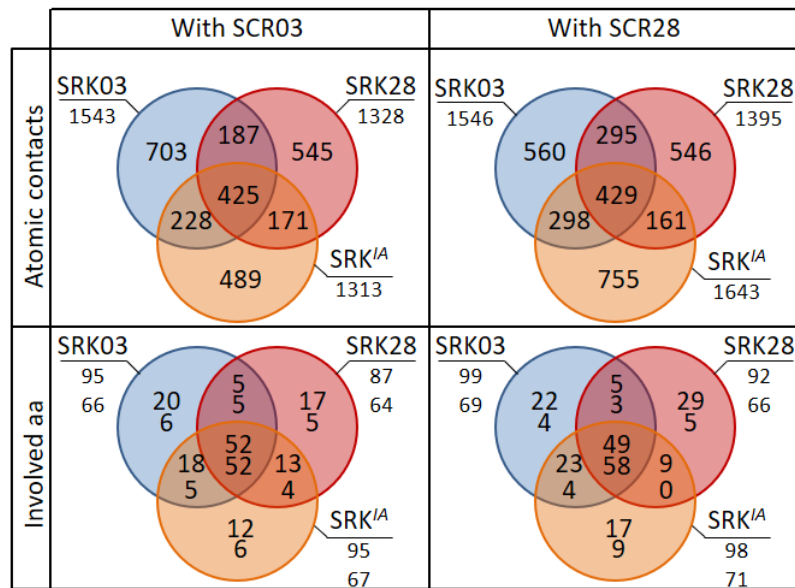

839

840 **Figure S9 Venn diagram representations of binding features for SRK03, SRK28 and SRKaIA receptors coupled with either**  
 841 **SCR03 or SCR28 ligand. Two features were compared: i) Atomic contacts are defined by the nature of the amino acid in both**  
 842 **proteins, the chain they belong to, their position and the respective atoms involved in the contact (C, N, O, CA main chain**  
 843 **atoms or the side chain atoms C $\alpha$ , C $\beta$ , C $\epsilon$ , ...) and ii) The amino acid involved are defined by the nature of the amino acid, the**  
 844 **chain they belong to and their position, independently for SRK (numbers on top) and SCR (bottom numbers). For instance,**  
 845 **SRKaIA shared 228 atomic contacts with SRK03 and only 171 contacts with SRK28, when complexed with SCR03. This**  
 846 **tendency is also apparent when SRKaIA was complexed with SCR28 (298 identical contact with SRK03 but only 161 with**  
 847 **SCR28).**

848



849

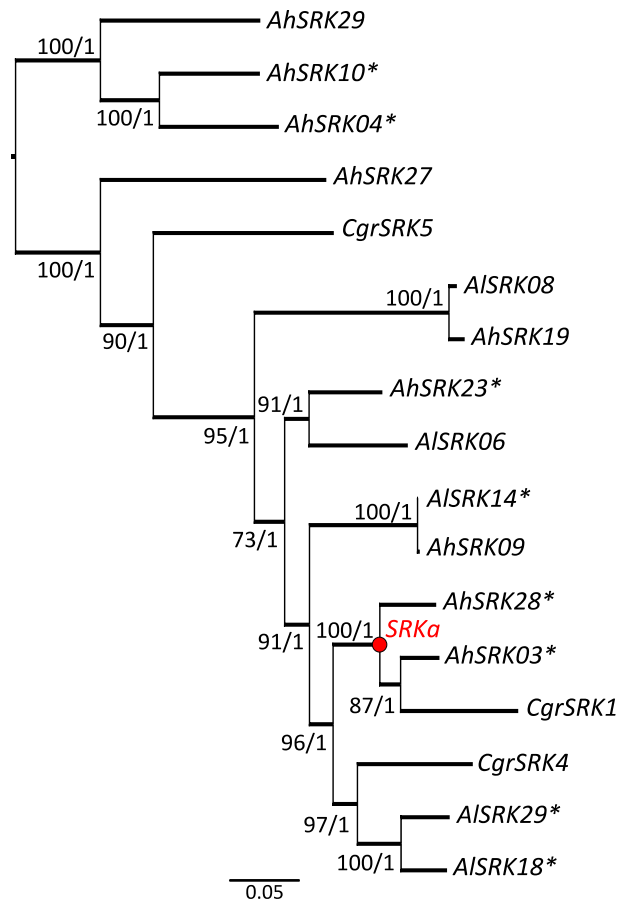

850

851 **Figure S10: Maximum likelihood phylogenetic tree based on the 17 SRK alleles used for SRKa construction.** The Bayesian  
852 reconstruction displays an identical topology. Values at the branches represent the bootstrap percentage / posterior  
853 probabilities. The node representing the reconstructed ancestral SRK allele (SRKa) is shown in red. Asterisks highlight alleles  
854 with a complete sequence available for ancestral reconstruction.

855

856

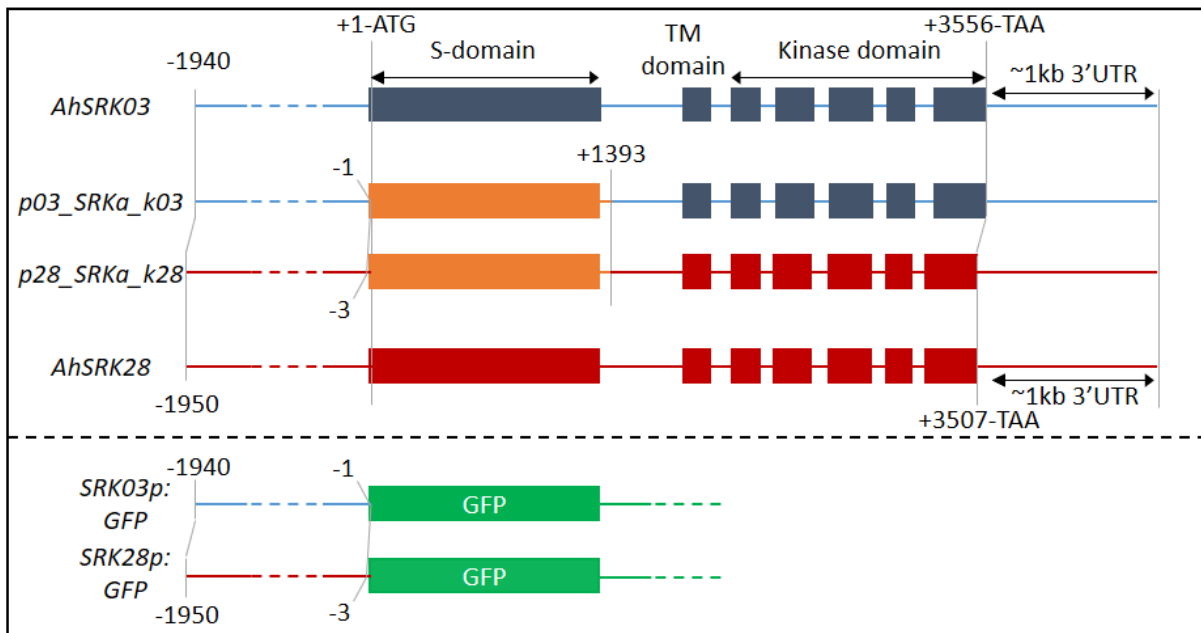

857

858 **Figure S11: Schematic representation of the molecular constructs used for *A. thaliana* transformation.** *AhSRK03* and  
859 *AhSRK28* constructs were cloned using a unique genomic fragment starting around -2 Kb and ending 1 Kb after the stop  
860 codon. *SRKa* constructs were each cloned using 3 DNA fragments (amplified promoter and kinase domain of *AhSRK03* or  
861 *AhSRK28* and the synthesized ancestral S-domain). The different parts of the construct were concatenated using the  
862 Multisite Gateway Technology at the positions indicated on the figure. *SRK03p:GFP* and *SRK28p:GFP* constructs were  
863 generated using the same promoter sequence as in the *SRKa* constructs, but were introduced into the *pKGWFS7.0*  
864 destination vector.

865

866 **Table S1: Detail of the different SRK/SCR interaction protein modelling.** Following the eSRK:SCR template structure where  
 867 two SCR molecules interact with two SRK proteins to form a heterotetramer (Ma et al., 2016), we indicate the two SRK  
 868 molecules with their chain identifier A and B and the two SCR molecules with G and H. For each complex, the number of  
 869 involved amino acids and the number of atomic contacts are defined for each protein chain interaction (AG, AH, BG and BH).  
 870 Underlined numbers in the column "involved aa" correspond to the number of amino acids involved in both cognate and  
 871 non-cognate interactions.

| SRK receptor | chain | SCR ligand | chain | SRK involved aa  | SCR involved aa | Atomic contacts |
|--------------|-------|------------|-------|------------------|-----------------|-----------------|
| S03          | A     | S03        | G     | <u>16</u> +6=22  | <u>9</u> +9=18  | 464             |
|              | A     |            | H     | <u>19</u> +13=32 | <u>12</u> +7=19 | 399             |
|              | B     |            | G     | <u>23</u> +1=24  | <u>7</u> +10=17 | 273             |
|              | B     |            | H     | <u>15</u> +2=17  | <u>7</u> +9=16  | 407             |
|              |       |            |       |                  |                 | <b>1543</b>     |
| S28          | A     | S28        | G     | <u>15</u> +1=16  | <u>8</u> +7=15  | 277             |
|              | A     |            | H     | <u>17</u> +7=24  | <u>10</u> +7=17 | 326             |
|              | B     |            | G     | <u>17</u> +18=35 | <u>4</u> +14=18 | 471             |
|              | B     |            | H     | <u>15</u> +2=17  | <u>9</u> +7=16  | 321             |
|              |       |            |       |                  |                 | <b>1395</b>     |
| S03          | A     | S28        | G     | <u>16</u> +5=21  | <u>9</u> +9=17  | 366             |
|              | A     |            | H     | <u>19</u> +8=27  | <u>10</u> +7=17 | 389             |
|              | B     |            | G     | <u>23</u> +4=28  | <u>4</u> +13=17 | 380             |
|              | B     |            | H     | <u>15</u> +8=23  | <u>9</u> +9=18  | 411             |
|              |       |            |       |                  |                 | <b>1546</b>     |
| S28          | A     | S03        | G     | <u>15</u> +5=20  | <u>9</u> +6=15  | 378             |
|              | A     |            | H     | <u>17</u> +10=27 | <u>12</u> +7=19 | 353             |
|              | B     |            | G     | <u>17</u> +3=20  | <u>7</u> +10=17 | 244             |
|              | B     |            | H     | <u>15</u> +5=20  | <u>7</u> +10=17 | 353             |
|              |       |            |       |                  |                 | <b>1328</b>     |

872

873

874 **Table S2. Accession numbers for the sequences used in the phylogenetic reconstruction**

875

876

| Sequence | Accession number |
|----------|------------------|
| AhSRK03  | KJ772380.1       |
| AhSRK04  | KJ461484.1       |
| AhSRK08  | EU075130.1       |
| AhSRK09  | EU075131.1       |
| AhSRK10  | KM592810.1       |
| AhSRK19  | EU075140.1       |
| AhSRK23  | EU878008.1       |
| AhSRK27  | EU878012.1       |
| AhSRK28  | KJ461478.1       |
| AhSRK29  | KM592798.1       |
| AISRK06  | GQ351354.1       |
| AISRK08  | JX464638.1       |
| AISRK14  | KJ772405.1       |
| AISRK18  | KJ772412.1       |
| AISRK29  | AY186776.1       |
| AISRK39  | KJ772418.1       |
| CgrSRK1  | DQ530637.1       |
| CgrSRK4  | DQ530640.1       |
| CgrSRK5  | DQ530641.1       |
| CgrSRK6  | DQ530642.1       |

877

878

879

880

881

882

883

884 **Table S3. PAML ancestral analyses of the SRK protein and model comparison.** *np* is the number of parameters in the  
 885 model; *lnL* is the log likelihood score; *AIC* (Akaike Information criterion =  $-2 \cdot \ln L + 2 \cdot np$ ) is a measure of the goodness of fit of  
 886 an estimated statistical model;  $\omega$  is the nonsynonymous/synonymous substitution ratio; *LR* is the likelihood ratio; *df* is the  
 887 degree of freedom in LRT (Likelihood Ratio Test); \*\*\* Highly significant (*P*-value < 0.0001).

888

| Model                                                     | np  | lnL      | AIC   | $\omega$                                                                        |
|-----------------------------------------------------------|-----|----------|-------|---------------------------------------------------------------------------------|
| <b>M0</b>                                                 | 43  | -8976.64 | 18039 | $\omega_0=0.51$                                                                 |
| <b>M0FMutSel0</b>                                         | 56  | -8949.78 | 18012 | $\omega_0=0.55$                                                                 |
| <b>M0FMutSel</b>                                          | 97  | -8878.19 | 17950 | $\omega_0=0.53$                                                                 |
| <b>M3</b>                                                 | 47  | -8765.23 | 17624 | $\omega_0=0.03, \omega_1=0.48, \omega_2=1.72$<br>$p_0=0.30, p_1=0.52, p_2=0.18$ |
| <b>M3FMutSel0</b>                                         | 60  | -8745.69 | 17607 | $\omega_0=0.19, \omega_1=1.41$<br>$p_0=0.65, p_1=0.35$                          |
| <b>M3FMutSel</b>                                          | 101 | -8684.54 | 17567 | $\omega_0=0.19, \omega_1=1.34$<br>$p_0=0.64, p_1=0.36$                          |
| <b>LRT M3FMutSel vs M3FMutSel0: LR = 122.3 (df=41)***</b> |     |          |       |                                                                                 |

889

890

891 **Table S4: Gateway primers used for molecular constructs.**

| Construct    | Primers                                                            | Sequences                                                                                                                                                                                                                      |
|--------------|--------------------------------------------------------------------|--------------------------------------------------------------------------------------------------------------------------------------------------------------------------------------------------------------------------------|
| AhSRK03      | attB1.-1940.-F<br>attB2.4555.R                                     | 5'-GGGGACAAGTTTGTACAAAAAAGCAGGCTAACCCCTGGCTTACTGACTTG-3'<br>5'-GGGGACCACTTTGTACAAGAAAGCTGGGTAATCGCCCGTTATTGCCTG-3'                                                                                                             |
| AhSRK28      | attB1.-1950.F<br>attB2.4555.R                                      | 5'-GGGGACAAGTTTGTACAAAAAAGCAGGCTAGGTTAGTCCATAGCCCTTG-3'<br>5'-GGGGACCACTTTGTACAAGAAAGCTGGGTAATCGCCCGTTATTGCCTG-3'                                                                                                              |
| AhSRK03p:GFP | attB1.-1940.F<br>attB2.-1.R                                        | 5'-GGGGACAAGTTTGTACAAAAAAGCAGGCTAACCCCTGGCTTACTGACTTG-3'<br>5'-GGGGACCACTTTGTACAAGAAAGCTGGGTCTCTCTCTACCCTGTGC-3'                                                                                                               |
| AhSRK28p:GFP | attB1.-1950.F<br>attB2.-3.R                                        | 5'-GGGGACAAGTTTGTACAAAAAAGCAGGCTAGGTTAGTCCATAGCCCTTG-3'<br>5'-GGGGACCACTTTGTACAAGAAAGCTGGGTCTCTCTCTACCCTGTGCTC-3'                                                                                                              |
| SRKa_03      | attB4.-1940.F<br>attB1r.-1.R<br>-<br>attB2r.1393.F<br>attB3.4555.R | 5'-GGGGACAAGTTTGTATAGAAAAGTTGAACCCCTGGCTTACTGACTTG-3'<br>5'-GGGGACTGCTTTTTTGTACAACTTGCTCTCTCTACCCTGTGC-3'<br>-<br>5'-GGGGACAGCTTTCTTGTACAAAGTGGCAACTTCCGGTTCCATATCC-3'<br>5'-GGGGACAAGTTTGTATAATAAAGTTGAATCGCCCGTTATTGCCTG-3'  |
| SRKa_28      | attB4.-1950.F<br>attB1r.-3.R<br>-<br>attB2r.1393.F<br>attB3.4555.R | 5'-GGGGACAAGTTTGTATAGAAAAGTTGAGGTTAGTCCATAGCCCTTG-3'<br>5'-GGGGACTGCTTTTTTGTACAACTTGCTCTCTCTACCCTGTGCTC-3'<br>-<br>5'-GGGGACAGCTTTCTTGTACAAAGTGGCAACTTCCGGTTCCATATCC-3'<br>5'-GGGGACAAGTTTGTATAATAAAGTTGAATCGCCCGTTATTGCCTG-3' |

892
